# Supplementary material for: Phylogenomic analysis of Apoidea sheds new light on the sister group of bees
Source: PubMed Central journal article supplement (PMC5960199; doi:10.1186/s12862-018-1155-8), 2018-05-18
Supplement: 12862_2018_1155_MOESM1_ESM.pdf [file 12862_2018_1155_MOESM1_ESM.pdf]

**Additional table S1:** Assembly statistics and number of identified single-copy genes in the analyzed enriched data set. Asterisks indicate information inferred data after the cross contamination check. DB7/5 = OrthoDB 7/5 database; Ct = average base-coverage depth of those contigs that contain a 250-bp long bait-binding sequence section<sup>1</sup>; bp = base pair.

| Species name                      | contigs             |                   |                           |                    |                              | GC content [%] | Number of identified orthologs from a total of 3266 (DB7/5) | Number of enriched orthologs from a total of 195 (DB8) | Captured genes | Number of on-target contigs | Number of off-target contigs | Length of contigs referring to target DNA (MIN-MAX) | Read count per contig referring to target DNA (MIN-MAX) | average base-coverage depth of contigs referring to target genes (C) |                  |               |       |
|-----------------------------------|---------------------|-------------------|---------------------------|--------------------|------------------------------|----------------|-------------------------------------------------------------|--------------------------------------------------------|----------------|-----------------------------|------------------------------|-----------------------------------------------------|---------------------------------------------------------|----------------------------------------------------------------------|------------------|---------------|-------|
|                                   | Number of raw reads | Number of contigs | Number of cleaned contigs | Assembly size [bp] | Size of smallest contig [bp] |                |                                                             |                                                        |                |                             |                              |                                                     |                                                         |                                                                      |                  |               |       |
| <i>Ampelis compressa</i>          | 298,491             | 7,526             | 7,733                     | 3,879,827          | 200                          | 7,646          | 5017                                                        | 47.2                                                   | 362            | 85.6                        | 253                          | 7,490                                               | 329,821,2659                                            | 185,5322,93688                                                       | 2545.1           |               |       |
| <i>Dolichopus</i> sp.             | 228,633             | 11,885            | 11,655                    | 4,740,862          | 200                          | 5,505          | 4064                                                        | 44.0                                                   | 94             | 48.2                        | 462                          | 11,213                                              | 204,338,1050                                            | 151,253,214003                                                       | 472.6            |               |       |
| <i>Amphiphi</i> sp.               | 1,626,101           | 78,389            | 78,216                    | 47,899,203         | 200                          | 10,709         | 8268                                                        | 48.1                                                   | 2,772          | 80.8                        | 2,650                        | 73,368                                              | 233,622,3958                                            | 48,338,017699                                                        | 3463.3           |               |       |
| <i>Chelybion</i> sp. I            | 1,586,111           | 23,783            | 22,756                    | 10,729,715         | 200                          | 6,256          | 471.5                                                       | 52.5                                                   | 162            | 83.1                        | 335                          | 246                                                 | 329,269899                                              | 246,329,269899                                                       | 1465.1           |               |       |
| <i>Chelybion</i> sp. II           | 1,848,229           | 14,637            | 13,531                    | 6,398,305          | 200                          | 8,782          | 472.9                                                       | 53.5                                                   | 242            | 169                         | 91.0                         | 304                                                 | 13,227                                                  | 319,655,8801                                                         | 43,531,67681     | 2038.5        |       |
| <i>Drosophila</i> sp.             | 190,444             | 6,001             | 6,001                     | 2,050,930          | 200                          | 2,775          | 341.7                                                       | 53.4                                                   | 191            | 114                         | 56.5                         | 276                                                 | 215,521,2022                                            | 208,423,11209                                                        | 398.8            |               |       |
| <i>Dynatos burmeisteri</i>        | 689,653             | 14,614            | 7,261                     | 3,171,194          | 200                          | 7,177          | 436.7                                                       | 48.2                                                   | 316            | 156                         | 80.0                         | 270                                                 | 6,991                                                   | 398,5212,26296                                                       | 398,5212,26296   | 2429          |       |
| <i>Etiennophilus melanotarsus</i> | 150,536             | 3,769             | 1,856                     | 908,261            | 200                          | 3,888          | 487.6                                                       | 51.1                                                   | 231            | 116                         | 73.8                         | 222                                                 | 327,616,1688                                            | 289,326,16438                                                        | 1235.7           |               |       |
| <i>Palaedon</i> sp.               | 601,200             | 64,787            | 61,677                    | 32,255,187         | 200                          | 5,794          | 523.0                                                       | 48.7                                                   | 1,461          | 177                         | 90.8                         | 2,187                                               | 59,460                                                  | 46,758,371108                                                        | 46,758,371108    | 375.9         |       |
| <i>Peripodops fuscipennis</i>     | 508,112             | 23,770            | 23,487                    | 11,575,416         | 200                          | 2,705          | 493.1                                                       | 52.1                                                   | 844            | 159                         | 81.5                         | 838                                                 | 22,838                                                  | 146,700,208595                                                       | 146,700,208595   | 395.0         |       |
| <i>Podiceps</i> sp.               | 732,385             | 16,704            | 10,800                    | 6,536,032          | 200                          | 2,580          | 504.9                                                       | 46.5                                                   | 137            | 70.3                        | 454                          | 10,993                                              | 237,426,2434                                            | 64,800,159494                                                        | 455.5            |               |       |
| <i>Protonyx subaustrius</i>       | 1,029,603           | 2,821             | 2,020                     | 990,004            | 202                          | 21,974         | 470.3                                                       | 47.9                                                   | 157            | 148                         | 74.9                         | 183                                                 | 1,837                                                   | 282,505,21654                                                        | 166,773,140,1236 | 880.4         |       |
| <i>Sylvia flammula</i>            | 197,196             | 3,495             | 3,203                     | 1,542,062          | 201                          | 4,056          | 481.4                                                       | 45.3                                                   | 220            | 162                         | 82.1                         | 278                                                 | 2,926                                                   | 389,352,2456                                                         | 145,720,30,806   | 251           |       |
| <i>Steganopleura cyaniventris</i> | 861,896             | 9,016             | 4,495                     | 2,033,019          | 200                          | 4,491          | 452.3                                                       | 49.7                                                   | 190            | 146                         | 74.9                         | 281                                                 | 4,244                                                   | 308,553,2674                                                         | 377,226,16,768   | 1245.9        |       |
| <i>Acanthostethus</i> sp.         | 638,200             | 7,862             | 6,977                     | 3,247,256          | 200                          | 4,426          | 466.8                                                       | 44.8                                                   | 264            | 188                         | 81.0                         | 319                                                 | 6,859                                                   | 209,689,2450                                                         | 116,728,69632    | 2810.0        |       |
| <i>Ammodramus</i> sp. II          | 444,209             | 9,454             | 8,621                     | 4,128,569          | 200                          | 4,566          | 466.0                                                       | 49.8                                                   | 258            | 158                         | 81.0                         | 343                                                 | 6,478                                                   | 129,528,79100                                                        | 298,429,2984     | 2262.4        |       |
| <i>Ammodramus</i> sp. I           | 67,065              | 3,478             | 3,152                     | 1,310,525          | 200                          | 5,705          | 415.8                                                       | 45.1                                                   | 85             | 75                          | 38.5                         | 103                                                 | 3,049                                                   | 210,642,1220                                                         | 179,1004,4503    | 568.4         |       |
| <i>Ammodramus</i> sp.             | 628,709             | 9,150             | 8,718                     | 4,122,260          | 200                          | 4,463          | 472.8                                                       | 48.8                                                   | 251            | 128                         | 65.6                         | 301                                                 | 8,417                                                   | 217,458,1676                                                         | 69,1501,61070    | 759.6         |       |
| <i>Ammodramus</i> sp.             | 1,408,454           | 33,434            | 32,761                    | 16,958,833         | 200                          | 6,018          | 517.7                                                       | 48.1                                                   | 720            | 250                         | 81.5                         | 1,068                                               | 31,693                                                  | 126,577,2289                                                         | 74,933,109705    | 310.8         |       |
| <i>Ammodramus</i> sp.             | 811,513             | 18,888            | 18,341                    | 10,221,369         | 200                          | 4,878          | 526.5                                                       | 47.8                                                   | 648            | 160                         | 85.1                         | 752                                                 | 16,689                                                  | 232,245,3433                                                         | 111,563,340633   | 375.2         |       |
| <i>Ammodramus</i> sp.             | 247,230             | 7,357             | 7,042                     | 3,998,403          | 120                          | 8,616          | 283.8                                                       | 44.7                                                   | 114            | 67                          | 44.6                         | 233                                                 | 6,809                                                   | 30,280,199415                                                        | 30,280,199415    | 62.8          |       |
| <i>Atalapha</i> sp. I             | 1,565,172           | 8,119             | 7,242                     | 4,207,389          | 200                          | 11,772         | 581.0                                                       | 47.1                                                   | 183            | 119                         | 61.0                         | 200                                                 | 7,012                                                   | 206,544,2620                                                         | 96,188,407138    | 904.4         |       |
| <i>Atalapha</i> sp. II            | 1,623,507           | 30,463            | 30,159                    | 16,088,844         | 200                          | 5,795          | 534.4                                                       | 51.0                                                   | 426            | 107                         | 54.8                         | 478                                                 | 2,927                                                   | 292,544,3206                                                         | 83,1223,140394   | 818.8         |       |
| <i>Balcanicus</i> sp.             | 333,013             | 3,950             | 3,602                     | 1,544,928          | 200                          | 4,924          | 428.9                                                       | 47.4                                                   | 239            | 156                         | 80.0                         | 283                                                 | 3,319                                                   | 209,522,1847                                                         | 122,206,22509    | 597.6         |       |
| <i>Bemidictus</i> sp.             | 632,961             | 41,237            | 40,991                    | 20,814,921         | 200                          | 5,968          | 507.8                                                       | 48.1                                                   | 872            | 181                         | 73.1                         | 1,287                                               | 39,977                                                  | 201,526,3692                                                         | 144,829,27000    | 394.5         |       |
| <i>Bicyctes ventralis</i>         | 560,776             | 24,117            | 23,159                    | 10,401,406         | 200                          | 8,442          | 446.1                                                       | 48.9                                                   | 468            | 168                         | 86.2                         | 558                                                 | 22,601                                                  | 398,526,3111                                                         | 93,852,186545    | 371.2         |       |
| <i>Brachypteryx</i> sp.           | 1,637,919           | 29,332            | 28,880                    | 15,139,206         | 200                          | 5,846          | 524.2                                                       | 44.3                                                   | 857            | 171                         | 87.7                         | 1,282                                               | 27,588                                                  | 209,652,3078                                                         | 24,822,267228    | 484.3         |       |
| <i>Carinostomus</i> sp.           | 436,462             | 3,606             | 3,441                     | 1,564,070          | 200                          | 4,170          | 457.7                                                       | 48.6                                                   | 179            | 179                         | 73.8                         | 218                                                 | 3,243                                                   | 203,150,2014                                                         | 179,2623,23026   | 1289.2        |       |
| <i>Cercinis acanthophylla</i>     | 707,573             | 11,849            | 10,800                    | 5,452,604          | 200                          | 5,280          | 504.9                                                       | 46.5                                                   | 296            | 160                         | 82.1                         | 1,041                                               | 10,481                                                  | 231,495,2096                                                         | 134,1724,58888   | 685.8         |       |
| <i>Cercinis arenaria</i>          | 2,404,686           | 38,385            | 36,388                    | 17,981,058         | 200                          | 4,917          | 513.2                                                       | 48.7                                                   | 510            | 207                         | 64.6                         | 297                                                 | 16,246                                                  | 225,259,3916                                                         | 107,569,200600   | 814.3         |       |
| <i>Clypeodactylus scutellatus</i> | 833,770             | 13,035            | 12,876                    | 6,938,219          | 200                          | 6,454          | 481.0                                                       | 42.0                                                   | 303            | 159                         | 81.5                         | 262                                                 | 12,605                                                  | 333,803,1967                                                         | 207,726,3,1294   | 2280.5        |       |
| <i>Clypeodactylus</i> sp.         | 17,179              | 683               | 683                       | 1,488,185          | 200                          | 16,782         | 42.81                                                       | 43.7                                                   | 365            | 179                         | 61.7                         | 437                                                 | 365                                                     | 201,526,20847                                                        | 201,526,20847    | 112.3         |       |
| <i>Craobro scutellatus</i>        | 1,786,274           | 54,479            | 52,878                    | 26,497,746         | 200                          | 9,315          | 501.1                                                       | 51.1                                                   | 1,114          | 172                         | 88.2                         | 1,666                                               | 51,212                                                  | 222,406,3529                                                         | 91,600,532011    | 308.6         |       |
| <i>Dasyproctus</i> sp.            | 219,655             | 10,541            | 10,295                    | 5,038,894          | 200                          | 8,560          | 489.1                                                       | 49.9                                                   | 264            | 147                         | 75.4                         | 314                                                 | 9,981                                                   | 297,002,1743                                                         | 130,308,4,1248   | 1276.0        |       |
| <i>Delimys</i> sp.                | 1,677,666           | 6,034             | 6,035                     | 6,134,633          | 200                          | 4,666          | 462.4                                                       | 47.5                                                   | 191            | 101                         | 66.6                         | 475                                                 | 319                                                     | 264,432,6466                                                         | 91,1432,20,209   | 814.1         |       |
| <i>Dryostella</i> sp.             | 266,998             | 3,526             | 2,428                     | 1,162,538          | 200                          | 4,816          | 478.8                                                       | 48.0                                                   | 82             | 70                          | 35.9                         | 100                                                 | 2,328                                                   | 233,633,1550                                                         | 78,772,9,158     | 428.0         |       |
| <i>Ectemnus arenaria</i>          | 947,114             | 24,155            | 23,089                    | 11,958,244         | 200                          | 4,449          | 486.3                                                       | 49.9                                                   | 602            | 240                         | 80.8                         | 1,074                                               | 2,996                                                   | 200,199,622                                                          | 100,199,622      | 1183.3        |       |
| <i>Entomophthalmus</i> sp.        | 1,001,384           | 29,041            | 28,650                    | 13,576,164         | 200                          | 4,846          | 473.9                                                       | 48.2                                                   | 882            | 162                         | 83.1                         | 1,279                                               | 2,731                                                   | 204,410,2862                                                         | 107,633,138744   | 385.9         |       |
| <i>Euclypterus arenaria</i>       | 507,621             | 7,601             | 7,339                     | 3,352,956          | 204                          | 6,879          | 456.9                                                       | 48.5                                                   | 222            | 149                         | 76.4                         | 252                                                 | 7,087                                                   | 299,562,2943                                                         | 90,424,84636     | 1120.1        |       |
| <i>Forxide bare</i> sp. parte I   | 1,623,507           | 6,034             | 5,441                     | 3,296,320          | 200                          | 5,160          | 511.0                                                       | 49.3                                                   | 163            | 113                         | 61.0                         | 193                                                 | 413                                                     | 190,312,6196                                                         | 100,312,6196     | 1686.1        |       |
| <i>Forxide bare</i> sp. parte II  | 1,188,000           | 20,716            | 18,964                    | 10,200,311         | 200                          | 3,918          | 538.4                                                       | 53.8                                                   | 168            | 41                          | 21.0                         | 202                                                 | 18,762                                                  | 290,512,2490                                                         | 113,622,86422    | 204.1         |       |
| <i>Goytia subulatus</i>           | 5,124               | 4,298             | 4,298                     | 6,796,758          | 200                          | 8,896          | 534.2                                                       | 46.1                                                   | 398            | 204                         | 65.2                         | 665                                                 | 200                                                     | 242,869,2000                                                         | 242,869,2000     | 148.0         |       |
| <i>Holocentrus</i> sp.            | 576,118             | 932               | 539                       | 269,260            | 207                          | 21,915         | 499.8                                                       | 48.2                                                   | 22             | 22                          | 11                           | 2.0                                                 | 22                                                      | 517                                                                  | 278,526,21795    | 142,638,84933 | 427.9 |
| <i>Holobrycon</i> sp.             | 703,620             | 5,023             | 4,854                     | 2,788,838          | 200                          | 5,352          | 464.4                                                       | 46.8                                                   | 168            | 103                         | 68.6                         | 188                                                 | 638                                                     | 235,347,511                                                          | 58,325,347,511   | 1063.6        |       |
| <i>Hoplosternus</i> sp.           | 397,234             | 29,725            | 29,343                    | 16,574,552         | 200                          | 8,257          | 564.9                                                       | 48.6                                                   | 974            | 172                         | 88.2                         | 1,282                                               | 28,081                                                  | 230,564,4086                                                         | 62,141,397,840   | 358.3         |       |
| <i>Larra</i> sp.                  | 903,930             | 14,458            | 13,596                    | 7,019,935          | 202                          | 7,002          | 516.3                                                       | 54.3                                                   | 339            | 148                         | 75.9                         | 420                                                 | 13,178                                                  | 220,612,3312                                                         | 51,444,14531     | 593.9         |       |
| <i>Larropis</i> sp.               | 864,880             | 10,976            | 8,196                     | 4,071,856          | 200                          | 10,318         | 442.8                                                       | 54.1                                                   | 204            | 113                         | 61.8                         | 243                                                 | 541                                                     | 131,626,2006                                                         | 69,255,465874    | 972.9         |       |
| <i>Leptocryptus</i> sp.           | 1,985,322           | 6,845             | 6,232                     | 3,007,383          | 200                          | 7,773          | 482.8                                                       | 48.0                                                   | 276            | 155                         | 79.5                         | 354                                                 | 5,878                                                   | 200,523,2424                                                         | 49,872,97622     | 1751.8        |       |
| <i>Lindonia panzeri</i>           | 889,427             | 9,377             | 6528                      | 2,316,373          | 120                          | 8,830          | 355.3                                                       | 47.8                                                   | 151            | 36                          | 18.5                         | 171                                                 | 6,357                                                   | 140,552,8404                                                         | 95,775,174796    | 428.7         |       |
| <i>Ligopygus</i> sp.              | 212,391             | 2,151             | 1,827                     | 801,962            | 100                          | 10,529         | 430.0                                                       | 48.8                                                   | 167            | 105                         | 75.4                         | 195                                                 | 1,832                                                   | 284,580,2303                                                         | 177,248,24802    | 1079.9        |       |
| <i>Liris</i> sp.                  | 1,504,632           | 21,549            | 21,220                    | 9,692,379          | 200                          | 6,178          | 456.8                                                       | 55.7                                                   | 389            | 145                         | 74.0                         | 203                                                 | 10,760                                                  | 249,510,3343                                                         | 83,002,318804    | 981.9         |       |
| <i>Lirys</i> sp.                  | 933,611             | 12,022            | 11,010                    | 6,424,679          | 200                          | 6,868          | 492.7                                                       | 52.4                                                   | 345            | 154                         | 80.0                         | 437                                                 | 19,763                                                  | 216,262,3073                                                         | 100,262,3073     | 665.3         |       |
| <i>Microdembex</i> sp.            | 2,950,168           | 74,757            | 72,581                    | 42,327,119         | 200                          | 6,838          | 583.2                                                       | 47.2                                                   | 1,633          | 175                         | 89.7                         | 3,341                                               | 69,240                                                  | 200,502,5248                                                         | 57,442,32119     | 268.2         |       |
| <i>Microstia huxleyi</i>          | 1,691,804           | 19,500            | 19,500                    | 5,317,991          | 200                          | 8,653          | 477.8                                                       | 46.5                                                   | 387            | 165                         | 80.3                         | 737                                                 | 18,763                                                  | 204,674,7126                                                         | 50,596,199913    | 603.1         |       |
| <i>Minusa latibia</i>             | 1,028,170           | 14,731            | 13,822                    | 6,815,783          | 200                          | 4,567          | 476.8                                                       | 47.4                                                   | 413            | 168                         | 85.1                         | 598                                                 | 13,228                                                  | 200,484,2450                                                         | 55,1704,82828    | 880.2         |       |
| <i>Monacereus</i> sp.             | 1,325,223           | 22,073            | 19,880                    | 7,553,284          | 200                          | 6,178          | 475.3                                                       | 48.7                                                   | 444            | 130                         | 66.7                         | 719                                                 | 15,178                                                  | 201,463,3071                                                         | 89,100,180415    | 381.2         |       |
| <i>Neodactyloproctus</i> sp. I    | 2,111,251           | 25,335            | 25,126                    | 10,178,710         | 200                          | 10,610         | 477.3                                                       | 44.1                                                   | 231            | 72                          | 36.9                         | 330                                                 | 20,960                                                  | 204,552,10410                                                        | 83,1048,388183   | 818.8         |       |
| <i>Neodactyloproctus</i> sp. II   | 1,339,059           | 1,049             | 510                       | 345,009            | 218                          | 10,512         | 676.5                                                       | 47.3                                                   | 51             | 18                          | 9.2                          | 56                                                  | 454                                                     | 329,555,10301                                                        | 238,1022,3779446 | 454.1         |       |
| <i>Oncomeryx panamensis</i>       | 1,027,010           | 19,801            | 18,948                    | 8,738,304          | 200                          | 7,418          | 513.8                                                       | 48.4                                                   | 367            | 155                         | 78.5                         | 433                                                 | 18,515                                                  | 300,508,3004                                                         | 69,623,452594    | 1082.2        |       |
| <i>Paranysson</i> sp.             | 3,408,960           | 51,878            | 50,629                    | 26,290,713         | 200                          | 6,954          | 519.4                                                       | 51.8                                                   | 1,356          | 172                         | 88.2                         | 2,218                                               | 48,411                                                  | 214,812,3314                                                         | 56,622,283199    | 322.7         |       |
| <i>Philaenus gibbosus</i>         | 560,988             | 7,597             | 7,161                     | 3,414,237          | 201                          | 4,684          | 477.1                                                       | 42.2                                                   | 202            | 162                         | 82.4                         | 217                                                 | 1,827                                                   | 214,714,3183                                                         | 122,425,48999    | 1591.4        |       |
| <i>Pison</i> sp.                  | 497,572             | 11,061            | 10,848                    | 6,671,998          | 200                          | 3,289          | 512.0                                                       | 51.3                                                   | 356            | 159                         | 81.5                         | 146                                                 | 10,187                                                  | 319,617,                                                             |                  |               |       |

**Additional table S2:** Assembly statistics and number of identified single-copy genes in the analyzed transcriptomes. Gene recovery for the transcriptomic data set when using Orthograph version 0.5.6.

| Species name                       | Assembly size [bp] | Number of contigs | Size of smallest contig [bp] | Size of largest contig [bp] | N50 [bp] | GC content [%] | Number of identified orthologs (strict) | Number of identified orthologs (relaxed) | Number of identified orthologs used for target enrichment |
|------------------------------------|--------------------|-------------------|------------------------------|-----------------------------|----------|----------------|-----------------------------------------|------------------------------------------|-----------------------------------------------------------|
| <i>Alysson spinosus</i>            | 47,574,924         | 40,545            | 200                          | 21,220                      | 3,134    | 43.4           | 2,021                                   | 2,577                                    | 194                                                       |
| <i>Ammobates synticus</i>          | 32,110,512         | 22,137            | 200                          | 18,369                      | 2,789    | 40.7           | 1,957                                   | 2,395                                    | 192                                                       |
| <i>Ammophila sabulosa</i>          | 27,191,551         | 21,852            | 200                          | 19,285                      | 2,216    | 46.5           | 1,988                                   | 2,373                                    | 186                                                       |
| <i>Ampulex fasciata</i>            | 21,476,963         | 24,883            | 200                          | 16,932                      | 1,274    | 41.1           | 1,300                                   | 1,542                                    | 176                                                       |
| <i>Andrena vega</i>                | 29,428,733         | 25,569            | 200                          | 15,777                      | 2,133    | 43.4           | 2,003                                   | 2,496                                    | 192                                                       |
| <i>Anthidium manicatum</i>         | 27,880,352         | 22,793            | 200                          | 37,472                      | 2,044    | 40.8           | 2,091                                   | 2,538                                    | 190                                                       |
| <i>Anthophora plumipes</i>         | 30,778,652         | 29,861            | 200                          | 30,310                      | 1,812    | 39.2           | 2,010                                   | 2,445                                    | 191                                                       |
| <i>Astatia minor</i>               | 36,656,229         | 31,832            | 200                          | 23,055                      | 2,146    | 44.3           | 2,090                                   | 2,574                                    | 194                                                       |
| <i>Bembix rostrata</i>             | 37,839,804         | 33,341            | 200                          | 20,100                      | 2,075    | 39.0           | 1,930                                   | 2,325                                    | 190                                                       |
| <i>Bombus rufestris</i>            | 36,654,470         | 30,548            | 200                          | 44,845                      | 2,183    | 38.3           | 2,164                                   | 2,713                                    | 195                                                       |
| <i>Campoposium sacrum</i>          | 32,757,317         | 33,988            | 200                          | 29,013                      | 2,474    | 39.9           | 2,041                                   | 2,504                                    | 191                                                       |
| <i>Ceratina chalybea</i>           | 27,820,342         | 17,439            | 200                          | 18,982                      | 2,825    | 42.9           | 1,977                                   | 2,421                                    | 193                                                       |
| <i>Cerceris arenaria</i>           | 34,252,864         | 24,719            | 200                          | 27,246                      | 2,623    | 40.3           | 2,074                                   | 2,573                                    | 185                                                       |
| <i>Chalybion californicum</i>      | 33,977,878         | 21,323            | 200                          | 33,401                      | 3,091    | 42.6           | 1,878                                   | 2,322                                    | 191                                                       |
| <i>Chelostoma florissomme</i>      | 34,076,628         | 21,800            | 200                          | 38,028                      | 3,000    | 38.1           | 2,117                                   | 2,639                                    | 193                                                       |
| <i>Chlorion hirtum</i>             | 36,650,475         | 22,147            | 200                          | 32,363                      | 3,302    | 43.1           | 1,942                                   | 2,473                                    | 194                                                       |
| <i>Coelioxys conoidea</i>          | 33,319,440         | 31,666            | 200                          | 29,937                      | 1,835    | 38.6           | 2,077                                   | 2,554                                    | 192                                                       |
| <i>Colletes curvicaulus</i>        | 35,031,277         | 32,942            | 200                          | 29,986                      | 1,981    | 40.5           | 2,082                                   | 2,604                                    | 192                                                       |
| <i>Colpa sexmaculata</i>           | 34,941,997         | 26,456            | 200                          | 31,332                      | 2,484    | 40.7           | 1,933                                   | 2,345                                    | 189                                                       |
| <i>Crabro peltarius</i>            | 27,834,096         | 17,809            | 200                          | 16,863                      | 2,886    | 44.1           | 1,903                                   | 2,321                                    | 187                                                       |
| <i>Crossocerus quadrimaculatus</i> | 27,666,906         | 16,344            | 200                          | 19,322                      | 3,058    | 45.0           | 1,968                                   | 2,412                                    | 191                                                       |
| <i>Dasypoda hirtipes</i>           | 29,908,905         | 22,722            | 200                          | 28,960                      | 2,342    | 39.4           | 2,101                                   | 2,562                                    | 191                                                       |
| <i>Dinetus pictus</i>              | 35,261,360         | 20,195            | 200                          | 27,202                      | 3,438    | 45.1           | 2,023                                   | 2,531                                    | 192                                                       |
| <i>Diodontus minutus</i>           | 39,373,028         | 22,820            | 200                          | 27,275                      | 3,432    | 43.3           | 2,157                                   | 2,723                                    | 195                                                       |
| <i>Dioxya cincta</i>               | 44,526,242         | 28,227            | 200                          | 28,657                      | 3,015    | 38.0           | 2,089                                   | 2,644                                    | 193                                                       |
| <i>Dolichurus corniculatus</i>     | 27,844,688         | 19,309            | 200                          | 14,298                      | 2,745    | 39.3           | 1,967                                   | 2,387                                    | 186                                                       |
| <i>Dryadella pinguis</i>           | 30,800,832         | 19,086            | 200                          | 17,147                      | 3,089    | 44.4           | 1,994                                   | 2,449                                    | 190                                                       |
| <i>Dufourea dentiventris</i>       | 27,874,588         | 35,243            | 200                          | 22,057                      | 1,342    | 39.6           | 1,823                                   | 2,185                                    | 184                                                       |
| <i>Epiclerus variegatus</i>        | 29,366,977         | 23,624            | 200                          | 31,763                      | 2,115    | 39.9           | 2,105                                   | 2,429                                    | 190                                                       |
| <i>Eucera nigrescens</i>           | 29,687,969         | 32,735            | 200                          | 34,135                      | 1,394    | 38.6           | 1,538                                   | 1,815                                    | 177                                                       |
| <i>Eucera plumigera</i>            | 26,851,933         | 25,706            | 200                          | 20,428                      | 1,882    | 39.9           | 1,144                                   | 1,456                                    | 102                                                       |
| <i>Eucera styriaca</i>             | 28,054,992         | 27,204            | 200                          | 21,300                      | 1,789    | 39.0           | 1,288                                   | 1,560                                    | 123                                                       |
| <i>Euglossa dilemma</i>            | 40,223,937         | 31,871            | 200                          | 51,296                      | 2,423    | 39.8           | 2,129                                   | 2,604                                    | 191                                                       |
| <i>Gorytes laticinctus</i>         | 30,119,789         | 20,336            | 200                          | 27,853                      | 2,781    | 44.1           | 1,992                                   | 2,432                                    | 193                                                       |
| <i>Halictus quadricinctus</i>      | 32,852,514         | 24,065            | 200                          | 20,508                      | 2,520    | 41.0           | 2,012                                   | 2,441                                    | 193                                                       |
| <i>Harpactus elegans</i>           | 35,499,888         | 22,245            | 200                          | 27,045                      | 3,310    | 45.7           | 1,975                                   | 2,428                                    | 193                                                       |
| <i>Hemiteles truncorum</i>         | 35,349,951         | 23,340            | 200                          | 34,193                      | 2,804    | 40.1           | 2,106                                   | 2,670                                    | 190                                                       |
| <i>Hylaeus variegatus</i>          | 27,792,085         | 22,760            | 200                          | 16,898                      | 2,082    | 39.9           | 1,839                                   | 2,212                                    | 188                                                       |
| <i>LasioGLOSSUM xanthopus</i>      | 35,788,897         | 25,042            | 200                          | 16,569                      | 2,614    | 40.8           | 2,039                                   | 2,492                                    | 190                                                       |
| <i>Leucophaea cypaetea</i>         | 19,306,394         | 15,702            | 200                          | 19,154                      | 2,007    | 41.2           | 1,818                                   | 1,923                                    | 187                                                       |
| <i>Lins sa</i>                     | 17,840,977         | 17,815            | 200                          | 17,729                      | 2,901    | 43.9           | 1,890                                   | 1,989                                    | 189                                                       |
| <i>Lithurgus chrysurus</i>         | 32,731,326         | 24,312            | 200                          | 33,878                      | 2,397    | 39.1           | 2,079                                   | 2,514                                    | 191                                                       |
| <i>Macropis fulvipes</i>           | 27,205,906         | 21,091            | 200                          | 30,318                      | 2,262    | 40.7           | 1,960                                   | 2,346                                    | 191                                                       |
| <i>Megachile willughbiellae</i>    | 35,163,965         | 29,038            | 200                          | 33,703                      | 2,289    | 39.3           | 2,122                                   | 2,636                                    | 192                                                       |
| <i>Melitta haemorrhoidalis</i>     | 20,788,457         | 26,035            | 200                          | 12,759                      | 1,197    | 41.3           | 1,483                                   | 1,750                                    | 185                                                       |
| <i>Mellinus arvensis</i>           | 30,450,447         | 21,642            | 200                          | 17,911                      | 2,575    | 44.8           | 1,997                                   | 2,423                                    | 192                                                       |
| <i>Melita sp</i>                   | 73,133,740         | 54,688            | 200                          | 18,051                      | 2,430    | 43.3           | 2,101                                   | 2,607                                    | 194                                                       |
| <i>Nomada lethiburiana</i>         | 35,759,640         | 24,014            | 200                          | 17,457                      | 2,779    | 41.0           | 2,047                                   | 2,616                                    | 194                                                       |
| <i>Nomia diversipes</i>            | 29,177,935         | 21,953            | 200                          | 19,744                      | 2,299    | 39.8           | 2,066                                   | 2,473                                    | 192                                                       |
| <i>Nomioides sp</i>                | 28,076,986         | 31,377            | 200                          | 15,473                      | 1,575    | 40.8           | 1,814                                   | 2,161                                    | 185                                                       |
| <i>Nysson niger</i>                | 29,091,955         | 22,496            | 200                          | 24,856                      | 2,294    | 39.7           | 1,977                                   | 2,384                                    | 188                                                       |
| <i>Osma cornuta</i>                | 32,383,868         | 30,007            | 200                          | 29,116                      | 1,916    | 40.4           | 2,066                                   | 2,591                                    | 194                                                       |
| <i>Oxybelus bipunctatus</i>        | 37,187,137         | 22,233            | 200                          | 32,289                      | 3,447    | 40.5           | 1,968                                   | 2,525                                    | 195                                                       |
| <i>Palaura histrio</i>             | 28,994,684         | 17,033            | 200                          | 26,925                      | 3,226    | 45.1           | 1,865                                   | 2,248                                    | 191                                                       |
| <i>Parusurus dentipes</i>          | 28,437,230         | 23,066            | 200                          | 31,383                      | 1,925    | 40.3           | 1,970                                   | 2,375                                    | 190                                                       |
| <i>Pissabocus eremita</i>          | 33,770,894         | 25,059            | 200                          | 32,145                      | 2,475    | 40.5           | 2,036                                   | 2,458                                    | 190                                                       |
| <i>Pemphredon lugens</i>           | 39,425,911         | 24,675            | 200                          | 28,097                      | 3,266    | 41.3           | 2,079                                   | 2,625                                    | 193                                                       |
| <i>Philanthus triangulum</i>       | 27,356,021         | 21,729            | 200                          | 17,443                      | 2,225    | 38.3           | 1,898                                   | 2,257                                    | 190                                                       |
| <i>Pison atrum</i>                 | 26,691,364         | 24,840            | 200                          | 20,599                      | 1,965    | 44.5           | 1,850                                   | 2,236                                    | 187                                                       |
| <i>Podalonia hirsuta</i>           | 32,136,789         | 21,108            | 200                          | 21,318                      | 2,768    | 47.6           | 1,996                                   | 2,444                                    | 192                                                       |
| <i>Pompilus cinereus</i>           | 36,212,051         | 19,489            | 200                          | 27,429                      | 3,583    | 41.7           | 2,007                                   | 2,457                                    | 191                                                       |
| <i>Prionyx kirbi</i>               | 31,095,319         | 21,703            | 200                          | 29,684                      | 2,670    | 43.1           | 1,954                                   | 2,373                                    | 190                                                       |
| <i>Psenulus fuscipennis</i>        | 31,095,907         | 24,423            | 200                          | 22,011                      | 2,239    | 39.4           | 2,111                                   | 2,596                                    | 193                                                       |
| <i>Pseudoscolia sinicalia</i>      | 28,843,716         | 22,577            | 200                          | 26,252                      | 2,376    | 40.2           | 1,929                                   | 2,309                                    | 191                                                       |
| <i>Sapyga quinquepunctata</i>      | 33,296,307         | 22,097            | 200                          | 27,542                      | 2,745    | 46.0           | 2,049                                   | 2,572                                    | 191                                                       |
| <i>Sceliphron curvatum</i>         | 32,739,311         | 22,934            | 200                          | 18,683                      | 2,614    | 45.7           | 1,934                                   | 2,402                                    | 190                                                       |
| <i>Scolia hita</i>                 | 38,040,022         | 28,180            | 200                          | 19,699                      | 2,548    | 41.9           | 1,956                                   | 2,416                                    | 191                                                       |
| <i>Smicromyrme rufipes</i>         | 31,191,065         | 31,152            | 200                          | 16,628                      | 1,607    | 39.1           | 1,998                                   | 2,400                                    | 191                                                       |
| <i>Sphaecus corvallis</i>          | 25,618,375         | 19,967            | 200                          | 21,226                      | 2,247    | 42.4           | 1,799                                   | 2,155                                    | 188                                                       |
| <i>Sphaecodes siliabitoris</i>     | 36,915,692         | 33,273            | 200                          | 39,999                      | 1,996    | 42.8           | 2,101                                   | 2,646                                    | 192                                                       |
| <i>Sibex funereus</i>              | 37,603,328         | 26,189            | 200                          | 32,973                      | 3,921    | 43.3           | 1,962                                   | 2,477                                    | 192                                                       |
| <i>Spilomena beata</i>             | 31,845,961         | 24,104            | 200                          | 24,678                      | 2,386    | 41.4           | 2,040                                   | 2,466                                    | 192                                                       |
| <i>Stelis punctulifasciata</i>     | 39,729,802         | 28,380            | 200                          | 37,726                      | 2,649    | 40.1           | 2,175                                   | 2,745                                    | 195                                                       |
| <i>Stizoides indertensis</i>       | 34,689,230         | 27,724            | 200                          | 22,267                      | 2,487    | 42.5           | 1,907                                   | 2,285                                    | 189                                                       |
| <i>Stizus continuus</i>            | 24,816,142         | 21,045            | 200                          | 18,531                      | 1,970    | 40.6           | 1,806                                   | 2,144                                    | 192                                                       |
| <i>Systropha curvicornis</i>       | 34,780,634         | 34,917            | 200                          | 20,911                      | 1,819    | 39.9           | 1,967                                   | 2,383                                    | 195                                                       |
| <i>Tachysphex fulvitaris</i>       | 32,940,922         | 17,308            | 200                          | 28,002                      | 3,712    | 44.7           | 1,860                                   | 2,329                                    | 192                                                       |
| <i>Tetragonula carbonaria</i>      | 48,214,225         | 88,297            | 200                          | 18,096                      | 707      | 41.0           | 1,801                                   | 2,218                                    | 186                                                       |
| <i>Tetralonia malvae</i>           | 36,479,504         | 31,360            | 200                          | 42,751                      | 2,051    | 39.7           | 1,975                                   | 2,403                                    | 188                                                       |
| <i>Tetraloniella nigriceps</i>     | 29,157,534         | 25,917            | 200                          | 19,976                      | 2,187    | 40.1           | 1,493                                   | 1,841                                    | 139                                                       |
| <i>Tetraloniella sp</i>            | 26,307,232         | 27,649            | 200                          | 38,242                      | 1,623    | 39.9           | 1,355                                   | 1,662                                    | 128                                                       |
| <i>Thyrus orbatus</i>              | 39,691,151         | 26,321            | 200                          | 31,904                      | 2,889    | 40.3           | 2,036                                   | 2,566                                    | 194                                                       |
| <i>Tiphia femorata</i>             | 36,053,834         | 24,784            | 200                          | 18,719                      | 2,814    | 40.4           | 2,002                                   | 2,509                                    | 194                                                       |
| <i>Typoxylon figulus</i>           | 31,638,291         | 19,189            | 200                          | 15,729                      | 3,245    | 41.7           | 1,928                                   | 2,386                                    | 191                                                       |
| <i>Xylocopa violacea</i>           | 28,673,767         | 21,588            | 200                          | 27,956                      | 2,338    | 41.3           | 2,099                                   | 2,600                                    | 190                                                       |
| <b>min</b>                         | 19,308,584         | 16,702            | 200                          | 12,769                      | 707      | 38.0           | 1,144                                   | 1,466                                    | 102                                                       |
| <b>ave</b>                         | 32,772,673         | 25,853            | 200                          | 25,521                      | 2,437    | 41.4           | 1,940                                   | 2,382                                    | 187                                                       |
| <b>med</b>                         | 32,136,789         | 24,065            | 200                          | 24,856                      | 2,423    | 40.8           | 1,988                                   | 2,429                                    | 191                                                       |
| <b>max</b>                         | 73,133,740         | 88,297            | 200                          | 51,296                      | 3,712    | 47.6           | 2,175                                   | 2,745                                    | 195                                                       |

**Additional table S3:** List of species that showed rogue behavior in the phylogenetic analyses. c: consensus threshold; s: dropset size. MRE: majority rule consensus tree.

| supermatrix                                                                                     | c   | s | Rogue taxa                                                                                                                                      |
|-------------------------------------------------------------------------------------------------|-----|---|-------------------------------------------------------------------------------------------------------------------------------------------------|
| amino acid                                                                                      | 50  | 2 | <i>Heterogyna nocticola</i> , <i>Lindenius panzeri</i>                                                                                          |
|                                                                                                 |     | 3 | <i>Heterogyna nocticola</i> , <i>Lindenius panzeri</i>                                                                                          |
|                                                                                                 |     | 4 | <i>Heterogyna nocticola</i> , <i>Lindenius panzeri</i>                                                                                          |
|                                                                                                 | 75  | 2 | <i>Heterogyna nocticola</i> , <i>Lindenius panzeri</i> , <i>Neodasyproctus</i> sp. II                                                           |
|                                                                                                 |     | 3 | <i>Heterogyna nocticola</i> , <i>Lindenius panzeri</i> , <i>Neodasyproctus</i> sp. II                                                           |
|                                                                                                 |     | 4 | <i>Heterogyna nocticola</i> , <i>Lindenius panzeri</i> , <i>Neodasyproctus</i> sp. II                                                           |
|                                                                                                 | 100 | 2 | <i>Heterogyna nocticola</i> , <i>Lindenius panzeri</i> , <i>Neodasyproctus</i> sp. II, <i>Tanyoprymnus monedulooides</i>                        |
|                                                                                                 |     | 3 | <i>Heterogyna nocticola</i> , <i>Lindenius panzeri</i> , <i>Neodasyproctus</i> sp. II, <i>Tanyoprymnus monedulooides</i>                        |
|                                                                                                 |     | 4 | <i>Heterogyna nocticola</i> , <i>Lindenius panzeri</i> , <i>Neodasyproctus</i> sp. II, <i>Tanyoprymnus monedulooides</i>                        |
|                                                                                                 | MRE | 2 | <i>Heterogyna nocticola</i> , <i>Lindenius panzeri</i>                                                                                          |
|                                                                                                 |     | 3 | <i>Heterogyna nocticola</i> , <i>Lindenius panzeri</i>                                                                                          |
|                                                                                                 |     | 4 | <i>Heterogyna nocticola</i> , <i>Lindenius panzeri</i>                                                                                          |
| PF-NT-1,2 nucleotide (1 <sup>st</sup> and 2 <sup>nd</sup> codon position)                       | 50  | 2 | <i>Heterogyna nocticola</i> , <i>Microstictia hurdi</i>                                                                                         |
|                                                                                                 |     | 3 | <i>Heterogyna nocticola</i> , <i>Microstictia hurdi</i>                                                                                         |
|                                                                                                 |     | 4 | <i>Heterogyna nocticola</i> , <i>Microstictia hurdi</i>                                                                                         |
|                                                                                                 | 75  | 2 | <i>Heterogyna nocticola</i> , <i>Lindenius panzeri</i> , <i>Quexua</i> sp., <i>Tanyoprymnus monedulooides</i>                                   |
|                                                                                                 |     | 3 | <i>Heterogyna nocticola</i> , <i>Lindenius panzeri</i> , <i>Quexua</i> sp., <i>Tanyoprymnus monedulooides</i>                                   |
|                                                                                                 |     | 4 | <i>Heterogyna nocticola</i> , <i>Lindenius panzeri</i> , <i>Quexua</i> sp., <i>Tanyoprymnus monedulooides</i>                                   |
|                                                                                                 | 100 | 2 | <i>Heterogyna nocticola</i> , <i>Tanyoprymnus monedulooides</i> , <i>Lindenius panzeri</i> , <i>Dryudella</i> sp., <i>Neodasyproctus</i> sp. II |
|                                                                                                 |     | 3 | <i>Heterogyna nocticola</i> , <i>Tanyoprymnus monedulooides</i> , <i>Lindenius panzeri</i> , <i>Dryudella</i> sp., <i>Neodasyproctus</i> sp. II |
|                                                                                                 |     | 4 | <i>Heterogyna nocticola</i> , <i>Tanyoprymnus monedulooides</i> , <i>Lindenius panzeri</i> , <i>Dryudella</i> sp., <i>Neodasyproctus</i> sp. II |
|                                                                                                 | MRE | 2 | <i>Heterogyna nocticola</i>                                                                                                                     |
|                                                                                                 |     | 3 | <i>Heterogyna nocticola</i>                                                                                                                     |
|                                                                                                 |     | 4 | <i>Heterogyna nocticola</i>                                                                                                                     |
| PF-NT-1,2,3 nucleotide (1 <sup>st</sup> , 2 <sup>nd</sup> , and 3 <sup>rd</sup> codon position) | 50  | 2 | <i>Heterogyna nocticola</i> , <i>Lindenius panzeri</i> , <i>Tetraloniella</i> sp., <i>Microstictia hurdi</i>                                    |
|                                                                                                 |     | 3 | <i>Heterogyna nocticola</i> , <i>Lindenius panzeri</i> , <i>Tetraloniella</i> sp., <i>Microstictia hurdi</i>                                    |
|                                                                                                 |     | 4 | <i>Heterogyna nocticola</i> , <i>Lindenius panzeri</i> , <i>Tetraloniella</i> sp., <i>Microstictia hurdi</i>                                    |
|                                                                                                 | 75  | 2 | <i>Heterogyna nocticola</i> , <i>Lindenius panzeri</i> , <i>Tetraloniella</i> sp., <i>Microstictia hurdi</i> , <i>Neodasyproctus</i> sp. II     |
|                                                                                                 |     | 3 | <i>Heterogyna nocticola</i> , <i>Lindenius panzeri</i> , <i>Tetraloniella</i> sp., <i>Microstictia hurdi</i> , <i>Neodasyproctus</i> sp. II     |
|                                                                                                 |     | 4 | <i>Heterogyna nocticola</i> , <i>Lindenius panzeri</i> , <i>Tetraloniella</i> sp., <i>Microstictia hurdi</i> , <i>Neodasyproctus</i> sp. II     |
|                                                                                                 | 100 | 2 | <i>Heterogyna nocticola</i> , <i>Lindenius panzeri</i> , <i>Pompilus cinereus</i> , <i>Tanyoprymnus monedulooides</i>                           |
|                                                                                                 |     | 3 | <i>Heterogyna nocticola</i> , <i>Lindenius panzeri</i> , <i>Pompilus cinereus</i> , <i>Tanyoprymnus monedulooides</i>                           |
|                                                                                                 |     | 4 | <i>Heterogyna nocticola</i> , <i>Lindenius panzeri</i> , <i>Pompilus cinereus</i> , <i>Tanyoprymnus monedulooides</i>                           |
|                                                                                                 | MRE | 2 | <i>Heterogyna nocticola</i>                                                                                                                     |
|                                                                                                 |     | 3 | <i>Heterogyna nocticola</i>                                                                                                                     |
|                                                                                                 |     | 4 | <i>Heterogyna nocticola</i> , <i>Nomada lathburiana</i> , <i>Ammobates syriacus</i> , <i>Tetraloniella nigriceps</i> , <i>Tetraloniella</i> sp. |

**Additional table S4:** List of families, subfamilies, and tribes of apoid wasps included in the present investigation. Shown is the traditional classification of apoid wasp as given in the Catalog of Sphecidae *sensu lato* by Pulawski (2016). Bold numbers indicate the total number of described groups as listed by Pulawski (2016); numbers in parentheses indicate the number of species of a given taxonomic group included in this study. \* samples of the subfamily Eremiasphecinae were unavailable to us; \*\* samples of the tribe Aphelotomini were unavailable to us; \*\*\* samples of the tribes Bothynostethini, Entomosericini, Eremiasphecini, Laphyragogini, and Xenosphecini were unavailable to us.

| <b>Family</b>    | <b>Subfamilies</b> | <b>Tribes</b>     |
|------------------|--------------------|-------------------|
| Heterogynaidae   | N/A                | N/A               |
| Ampulicidae      | <b>2</b> (2)       | <b>3</b> (2)**    |
| Sphecidae s.str. | <b>4</b> (4)       | <b>5</b> (5)      |
| Crabronidae      | <b>8</b> (7)*      | <b>23</b> (18)*** |

**Additional table S5:** Detailed list of species included in the target DNA enrichment. Listed are information about the sampled data, sampling site and date as well as the quantity of extracted genomic DNA. Taxonomic classification according to W. J. Pulawski (2016). We included two bees and the following apoid wasps: two Ampulicidae, 12 Sphecidae s.str., 78 Crabronidae and one Heterogynaidae.

| Family              | Subfamily      | Tribe           | Subtribe       | Species                                    | preservation date | preservation material | collection place                        | male / female | Amount of extracted DNA [ng/μl] |
|---------------------|----------------|-----------------|----------------|--------------------------------------------|-------------------|-----------------------|-----------------------------------------|---------------|---------------------------------|
| Ampulicidae         |                | Ampulicini      |                | <i>Ampulex compressa</i>                   | August 2013       | 96 % ethanol          | Düsseldorf, Germany                     | m             | 3,1                             |
| Ampulicidae         | Dolichurinae   |                 |                | <i>Dolichurus</i> sp.                      | 22.29.10.2007     | 96 % ethanol          | Madagascar                              | m             | 0,8                             |
| Sphecidae s.str.    | Ammophiliinae  |                 |                | <i>Ammophila</i> sp.                       | August 2013       | 96 % ethanol          | Arizona, SW-USA                         | m             | 8,1                             |
| Sphecidae s.str.    | Ammophiliinae  |                 |                | <i>Enanyia melanaria</i>                   | January 2006      | 70 % ethanol          | Argentina, South America                | m             | 7,76                            |
| Sphecidae s.str.    | Ammophiliinae  |                 |                | <i>Podalonia</i> sp.                       | February 2013     | 96 % ethanol          | Nicaragua, Central America              | m             | 55,0                            |
| Sphecidae s.str.    | Chlorioninae   |                 |                | <i>Chlorion</i> sp.                        | August 2013       | 96 % ethanol          | Arizona, SW-USA                         | m             | 16,8                            |
| Sphecidae s.str.    | Sceliphrinae   | Podini          |                | <i>Dynatus burmeisteri</i>                 | January 2006      | 70 % ethanol          | Argentina, South America                | m             | 6,26                            |
| Sphecidae s.str.    | Sceliphrinae   | Podini          |                | <i>Pezopodum fumpferne</i>                 | unknown date      | 70 % ethanol          | unknown origin                          | f             | 5,2                             |
| Sphecidae s.str.    | Sceliphrinae   | Sceliphriini    |                | <i>Chalybion</i> sp. I                     | February 2013     | 96 % ethanol          | Nicaragua, Central America              | m             | 26,9                            |
| Sphecidae s.str.    | Sceliphrinae   | Sceliphriini    |                | <i>Chalybion</i> sp. II                    | February 2013     | 96 % ethanol          | Nicaragua, Central America              | m             | 28,2                            |
| Sphecidae s.str.    | Sphecinae      | Prionychini     |                | <i>Palmodes</i> sp.                        | August 2012       | 96 % ethanol          | Arizona, SW-USA                         | m             | 11,5                            |
| Sphecidae s.str.    | Sphecinae      | Prionychini     |                | <i>Prionyx substriatus</i>                 | August 2013       | 96 % ethanol          | Arizona, SW-USA                         | m             | 5,29                            |
| Sphecidae s.str.    | Sphecinae      | Sphechini       |                | <i>Sphex funerarius</i> II                 | August 2003       | 70 % ethanol          | Isd of Rhodos, Greece                   | m             | 14,0                            |
| Sphecidae s.str.    | Sphecinae      | Stangeellini    |                | <i>Stangeella cyaniventris</i>             | January 2006      | 70 % ethanol          | Argentina, South America                | m             | 30,9                            |
| Crabronidae         | Astatiinae     |                 |                | <i>Astata</i> sp. I                        | 23.04.2013        | 96 % ethanol          | Israel ON_3882                          | m             | 0,42                            |
| Crabronidae         | Astatiinae     |                 |                | <i>Astata</i> sp. II                       | August 2013       | 96 % ethanol          | Arizona, SW-USA                         | m             | 15,2                            |
| Crabronidae         | Astatiinae     |                 |                | <i>Dryudella</i> sp.                       | August 2012       | 96 % ethanol          | Arizona, SW-USA                         | m             | 1,13                            |
| Crabronidae         | Bembicinae     | Alyssorini      |                | <i>Ditinea</i> sp.                         | 01.07.2013        | 96 % ethanol          | Israel ON_5374                          | m             | 5,96                            |
| Crabronidae         | Bembicinae     | Bembicini       | Bembicina      | <i>Bicytes ventralis</i>                   | August 2012       | 96 % ethanol          | Arizona, SW-USA                         | m             | 11,5                            |
| Crabronidae         | Bembicinae     | Bembicini       | Bembicina      | <i>Microbembex</i> sp.                     | February 2013     | 96 % ethanol          | Nicaragua, Central America              | m             | 16,1                            |
| Crabronidae         | Bembicinae     | Bembicini       | Bembicina      | <i>Rubrica nasuta</i>                      | January 2006      | 70 % ethanol          | Argentina, South America                | m             | 9,7                             |
| Crabronidae         | Bembicinae     | Bembicini       | Bembicina      | <i>Selman notatus</i>                      | January 2006      | 70 % ethanol          | Argentina, South America                | m             | 24,5                            |
| Crabronidae         | Bembicinae     | Bembicini       | Bembicina      | <i>Sitica heros</i>                        | February 2013     | 96 % ethanol          | Nicaragua, Central America              | m             | 92,6                            |
| Crabronidae         | Bembicinae     | Bembicini       | Bembicina      | <i>Trichosticta</i> sp.                    | May 2011          | 70 % ethanol          | Peru, South America                     | f             | 22,8                            |
| Crabronidae         | Bembicinae     | Bembicini       | Gorylina       | <i>Argorytes</i> sp.                       | June 2003         | 70 % ethanol          | California, USA                         | f             | 5,69                            |
| Crabronidae         | Bembicinae     | Bembicini       | Gorylina       | <i>Gorytes albidulus</i>                   | July 2013         | 96 % ethanol          | Brandenburg, Germany                    | m             | 3,3                             |
| Crabronidae         | Bembicinae     | Bembicini       | Gorylina       | <i>Pseuoptilus (Gorytes) willcoxi</i>      | August 2012       | 96 % ethanol          | Arizona, SW-USA                         | m             | 4,91                            |
| Crabronidae         | Bembicinae     | Bembicini       | Gorylina       | <i>Hoplisoides</i> sp.                     | August 2013       | 96 % ethanol          | Arizona, SW-USA                         | m             | 7,7                             |
| Crabronidae         | Bembicinae     | Bembicini       | Gorylina       | <i>Logorytes</i> sp.                       | January 2006      | 70 % ethanol          | Argentina, South America                | m             | 10,9                            |
| Crabronidae         | Bembicinae     | Bembicini       | Gorylina       | <i>Psammaeus colorator</i>                 | 26.05.2012        | 96 % ethanol          | Israel ON_5251                          | m             | 12,4                            |
| Crabronidae         | Bembicinae     | Bembicini       | Sphecina       | <i>Ammatomus</i> sp. I                     | May 2009          | 70 % ethanol          | Thailand T4828                          | m             | 4,0                             |
| Crabronidae         | Bembicinae     | Bembicini       | Sphecina       | <i>Ammatomus</i> sp. II                    | May 2009          | 70 % ethanol          | Thailand T4828                          | m             | 26,9                            |
| Crabronidae         | Bembicinae     | Bembicini       | Sphecina       | <i>Sphecius spectabilis</i>                | January 2006      | 70 % ethanol          | Argentina, South America                | m             | 13,6                            |
| Crabronidae         | Bembicinae     | Bembicini       | Sphecina       | <i>Tanyoprymnus moneduloides</i>           | August 2001       | 70 % ethanol          | Arizona, SW-USA                         | m             | 22,8                            |
| Crabronidae         | Bembicinae     | Bembicini       | Sphecina       | <i>Tanyoprymnus</i> sp.                    | August 2013       | 96 % ethanol          | Arizona, SW-USA                         | m             | 1,2                             |
| Crabronidae         | Bembicinae     | Bembicini       | Sitellina      | <i>Microsticta hundi</i>                   | August 2007       | 70 % ethanol          | Arizona, SW-USA                         | m             | 28,2                            |
| Crabronidae         | Bembicinae     | Bembicini       | Sitellina      | <i>Sitellina duplicata</i>                 | August 2012       | 96 % ethanol          | Arizona, SW-USA                         | m             | 14,8                            |
| Crabronidae         | Bembicinae     | Bembicini       | Sitellina      | <i>Sitellina</i> sp.                       | August 2013       | 96 % ethanol          | Arizona, SW-USA                         | m             | 11,5                            |
| Crabronidae         | Bembicinae     | Bembicini       | Sitizna        | <i>Bembecinus</i> sp.                      | February 2013     | 96 % ethanol          | Nicaragua, Central America              | f             | 10,6                            |
| Crabronidae         | Bembicinae     | Bembicini       | Sitizna        | <i>Stizoides foxi</i>                      | August 2012       | 96 % ethanol          | Arizona, SW-USA                         | m             | 11,5                            |
| Crabronidae         | Bembicinae     | Bembicini       | Sitizna        | <i>Stizus aff marthae</i>                  | May 2012          | 96 % ethanol          | Israel ON_2530                          | m             | 10,9                            |
| Crabronidae         | Bembicinae     | Bembicini       | Sitizna        | <i>Stizus vespides</i>                     | May 2012          | 96 % ethanol          | Israel ON_2528                          | m             | 3,24                            |
| Crabronidae         | Bembicinae     | Helicocausina   | Helicocausina  | <i>Helicocausus</i> sp.                    | January 2006      | 70 % ethanol          | Argentina, South America                | m             | 1,21                            |
| Crabronidae         | Bembicinae     | Helicocausina   | Helicocausina  | <i>Tigupa</i> sp.                          | January 2006      | 70 % ethanol          | Argentina, South America                | f             | 16,1                            |
| Crabronidae         | Bembicinae     | Nyssonina       | Nyssonina      | <i>Acanthostethus</i> sp.                  | 15.10.2014        | 96 % ethanol          | QL, Australien                          | m             | 21,9                            |
| Crabronidae         | Bembicinae     | Nyssonina       | Nyssonina      | <i>Brachyctes</i> sp.                      | October 2008      | 96 % ethanol          | Madagascar                              | m             | 7,87                            |
| Crabronidae         | Bembicinae     | Nyssonina       | Nyssonina      | <i>Synnevus</i> sp.                        | March 2009        | 70 % ethanol          | Thailand                                | m             | 17,4                            |
| Crabronidae         | Crabroninae    | Anacrabronina   | Anacrabronina  | <i>Anacrabro</i> sp.                       | January 2006      | 70 % ethanol          | Argentina, South America                | m             | 9,73                            |
| Crabronidae         | Crabroninae    | Anacrabronina   | Anacrabronina  | <i>Entomognathus</i> sp.                   | 01.07.2013        | 96 % ethanol          | Israel ON_5421                          | m             | 3,26                            |
| Crabronidae         | Crabroninae    | Crabronina      | Crabronina     | <i>Crabro scutellatus</i>                  | June 2004         | 70 % ethanol          | Schwedt, Germany                        | m             | 16,3                            |
| Crabronidae         | Crabroninae    | Crabronina      | Crabronina     | <i>Dasyproctus</i> sp.                     | May 2008          | 96 % ethanol          | Madagascar                              | m             | 9,4                             |
| Crabronidae         | Crabroninae    | Crabronina      | Crabronina     | <i>Ectemnius sonorensis</i>                | August 2012       | 96 % ethanol          | Arizona, SW-USA                         | f             | 19,7                            |
| Crabronidae         | Crabroninae    | Crabronina      | Crabronina     | <i>Foxita bara</i> ssp. <i>patei</i> I     | September 2012    | 96 % ethanol          | Arizona, SW-USA                         | m             | 8,02                            |
| Crabronidae         | Crabroninae    | Crabronina      | Crabronina     | <i>Foxita bara</i> ssp. <i>patei</i> II    | August 2012       | 96 % ethanol          | Arizona, SW-USA                         | f             | 14,7                            |
| Crabronidae         | Crabroninae    | Crabronina      | Crabronina     | <i>Lestica alata</i>                       | July 2013         | 96 % ethanol          | Brandenburg, Germany                    | m             | 3,97                            |
| Crabronidae         | Crabroninae    | Crabronina      | Crabronina     | <i>Lindenius panzeri</i>                   | July 2013         | 96 % ethanol          | Brandenburg, Germany                    | m             | 3,99                            |
| Crabronidae         | Crabroninae    | Crabronina      | Crabronina     | <i>Manidectra</i> sp.                      | August 2013       | 96 % ethanol          | Arizona, SW-USA                         | f             | 2,2                             |
| Crabronidae         | Crabroninae    | Crabronina      | Crabronina     | <i>Neodasyproctus</i> sp. I                | October 2008      | 96 % ethanol          | Madagascar                              | m             | 1,54                            |
| Crabronidae         | Crabroninae    | Crabronina      | Crabronina     | <i>Neodasyproctus</i> sp. II               | October 2008      | 96 % ethanol          | Madagascar                              | m             | 1,51                            |
| Crabronidae         | Crabroninae    | Crabronina      | Crabronina     | <i>Queuxa</i> sp.                          | August 2012       | 96 % ethanol          | Ecuador, South America                  | f             | 17,3                            |
| Crabronidae         | Crabroninae    | Crabronina      | Crabronina     | <i>Rhopalum clavipes</i>                   | August 2012       | 96 % ethanol          | Arizona, SW-USA                         | f             | 2,14                            |
| Crabronidae         | Crabroninae    | Larriini        | Gastrosericina | <i>Holotachysphex</i> sp.                  | January 2009      | 96 % ethanol          | Madagascar                              | f             | 1,54                            |
| Crabronidae         | Crabroninae    | Larriini        | Gastrosericina | <i>Larropsis</i> sp.                       | August 2013       | 96 % ethanol          | Arizona, SW-USA                         | m             | 1,16                            |
| Crabronidae         | Crabroninae    | Larriini        | Gastrosericina | <i>Prospogastera nearctica</i>             | 24.08.2007        | 70 % ethanol          | Arizona, SW-USA                         | f             | 2,71                            |
| Crabronidae         | Crabroninae    | Larriini        | Gastrosericina | <i>Tachysphex</i> sp.                      | 12.10.2014        | 96 % ethanol          | NSW, Australien                         | m             | 0,86                            |
| Crabronidae         | Crabroninae    | Larriini        | Gastrosericina | <i>Tachytes amazonus</i>                   | January 2006      | 96 % ethanol          | Argentina, South America                | m             | 1,87                            |
| Crabronidae         | Crabroninae    | Larriini        | Gastrosericina | <i>Tachytes</i> sp.                        | 12.08.2013        | 96 % ethanol          | Arizona, SW-USA                         | m             | 7,77                            |
| Crabronidae         | Crabroninae    | Larriini        | Larriina       | <i>Larri</i> sp.                           | February 2013     | 96 % ethanol          | Nicaragua, Central America              | m             | 1,41                            |
| Crabronidae         | Crabroninae    | Larriini        | Larriina       | <i>Lirisa</i> sp. II                       | January 2009      | 70 % ethanol          | Thailand (T4288)                        | f             | 4,41                            |
| Crabronidae         | Crabroninae    | Miscophini      |                | <i>Lyroda</i> sp.                          | 11.10.2014        | 96 % ethanol          | NSW, Australien                         | f             | 0,15                            |
| Crabronidae         | Crabroninae    | Miscophini      |                | <i>Parangsson</i> sp.                      | 01.08.2012        | 96 % ethanol          | Gabon                                   | f             | 0,33                            |
| Crabronidae         | Crabroninae    | Miscophini      |                | <i>Sphodrotes</i> sp.                      | 13.10.2014        | 96 % ethanol          | NSW, Australien                         | f             | 2,98                            |
| Crabronidae         | Crabroninae    | Oxybelini       |                | <i>Belomicrus</i> sp.                      | August 2013       | 96 % ethanol          | Arizona, SW-USA                         | m             | 0,38                            |
| Crabronidae         | Crabroninae    | Trypoxylini     |                | <i>Pison</i> sp.                           | 15.10.2014        | 96 % ethanol          | QL, Australien                          | m             | 0,97                            |
| Crabronidae         | Crabroninae    | Trypoxylini     |                | <i>Trypoxylon (Trypargilum) lactitarse</i> | February 2013     | 96 % ethanol          | Nicaragua, Central America              | f             | 1,35                            |
| Crabronidae         | Pemphredoninae | Odontosphechini |                | <i>Odontosphecia paradoxus</i>             | January 2006      | 70 % ethanol          | Argentina, South America                | m             | 1,18                            |
| Crabronidae         | Pemphredoninae | Pemphredonini   | Ammoplanina    | <i>Ammoplanellus</i> sp.                   | November 2008     | 96 % ethanol          | Madagascar MG 54B 03                    | m             | 0,3                             |
| Crabronidae         | Pemphredoninae | Pemphredonini   | Ammoplanina    | <i>Ammoplanus</i> sp.                      | October 2008      | 96 % ethanol          | Madagascar                              | m             | 0,47                            |
| Crabronidae         | Pemphredoninae | Pemphredonini   | Pemphredonina  | <i>Polemistus</i> sp.                      | August 2012       | 96 % ethanol          | Arizona, SW-USA                         | m             | 0,12                            |
| Crabronidae         | Pemphredoninae | Pemphredonini   | Stigmina       | <i>Stigma</i> sp.                          | June 2012         | 70 % ethanol          | Ecuador                                 | m             | 0,42                            |
| Crabronidae         | Pemphredoninae | Pemphredonini   | Stigmina       | <i>Carinostigma</i> sp.                    | 5.-12.3.2009      | 70 % ethanol          | Thailand Khuean Srinagarindra NP (4778) | f             | 0,67                            |
| Crabronidae         | Pemphredoninae | Psenini         |                | <i>Mimesa lutaria</i>                      | July 2013         | 96 % ethanol          | Brandenburg, Germany                    | f             | 0,51                            |
| Crabronidae         | Pemphredoninae | Psenini         |                | <i>Psenulus dilectus</i>                   | 24.-31.12.2007    | 96 % ethanol          | Madagascar                              | m             | 0,13                            |
| Crabronidae         | Pemphredoninae | Psenini         |                | <i>Psenulus</i> sp.                        | August 2013       | 96 % ethanol          | California, SW-USA                      | m             | 0,56                            |
| Crabronidae         | Phanthinae     | Aphanthopini    |                | <i>Clypeadon sculteni</i>                  | August 2012       | 96 % ethanol          | Arizona, SW-USA                         | m             | 29,8                            |
| Crabronidae         | Phanthinae     | Aphanthopini    |                | <i>Clypeadon taurulus</i>                  | August 2012       | 96 % ethanol          | Arizona, SW-USA                         | m             | 10,9                            |
| Crabronidae         | Phanthinae     | Cercerini       |                | <i>Cerceris acanthophila</i>               | August 2012       | 96 % ethanol          | Arizona, SW-USA                         | m             | 0,26                            |
| Crabronidae         | Phanthinae     | Cercerini       |                | <i>Cerceris arenaria</i>                   | July 2013         | 96 % ethanol          | Brandenburg, Germany                    | m             | 2,69                            |
| Crabronidae         | Phanthinae     | Cercerini       |                | <i>Eucerceris arenaria</i>                 | August 2007       | 70 % ethanol          | Arizona, SW-USA                         | m             | 3,86                            |
| Crabronidae         | Phanthinae     | Phanthini       |                | <i>Phanthus gibbosus</i>                   | August 2012       | 96 % ethanol          | Arizona, SW-USA                         | m             | 1,82                            |
| Crabronidae         | Phanthinae     | Phanthini       |                | <i>Trachypus</i> sp.                       | February 2013     | 96 % ethanol          | Nicaragua, Central America              | f             | 5,24                            |
| Crabronidae         | Phanthinae     | Pseudocollini   |                | <i>Pseudocollia</i> sp.                    | May 2012          | 96 % ethanol          | Israel                                  | m             | 2,5                             |
| Heterogynaidae      |                |                 |                | <i>Heterogyna nocticola</i>                | December 2003     | 70 % ethanol          | Oman, Arabian Peninsula                 | m             | 0,57                            |
| Apidae (sensu lato) | Apidae         |                 |                | <i>Apis mellifera</i> II                   | August 2013       | 96 % ethanol          | Halle, Germany                          | m             | 142                             |
| Apidae (sensu lato) | Stenotritidae  |                 |                | <i>Ctenocolletes rufescens</i>             | 09.03.2011        | 96 % ethanol          | Australia, Credo Station                | m             | 17,4                            |

**Additional table S6:** List of species whose transcriptomic data (1KITE) was embedded in the enriched dataset. Published transcriptomes of apoid wasps and bees included in the study of Peters et al. (2017). Taxonomic classification of apoid wasps according to W. J. Pulawski (2016).

| Assembly file (e3: TSA accepted)                        |                   |               |             | species name                       |
|---------------------------------------------------------|-------------------|---------------|-------------|------------------------------------|
| 130314_1269_FCC1KFEACXX_L7_INSobdTCVRAAPEI-41.tsa.fas   | Ampulicidae       | Ampulicinae   | Ampulicini  | <i>Ampulex fasciata</i>            |
| 130125_1266_FCC1MY6ACXX_L3_INSnrgTAFRAAPEI-221.tsa.fas  | Ampulicidae       | Dolichurinae  |             | <i>Dolichurus corniculus</i>       |
| 110817_1809_FCD05CDACXX_L3_INSubsTBNRAAPEI-121.tsa.fas  | Andrenidae        |               |             | <i>Andrena vaga</i>                |
| 130919_1247_FCC2V7VACXX_L1_INSoftmTCNRAAPEI-41.tsa.fas  | Andrenidae        |               |             | <i>Camptopoeum sacrum</i>          |
| 130206_1238_FCC1LVUACXX_L1_INSlupTAMRAAPEI-74.tsa.fas   | Andrenidae        |               |             | <i>Panurgus dentipes</i>           |
| 110817_1809_FCD05CDACXX_L3_INSubsTBGRABPEI-127.tsa.fas  | Apiidae           |               |             | <i>Anthophora plumipes</i>         |
| 120429_1266_FCC0HG0ACXX_L7_INSyvTATRAAPEI-46.tsa.fas    | Apiidae           |               |             | <i>Bombus rupestris</i>            |
| 120707_1249_FCD111GACXX_L4_INSwptTARRAAPEI-11.tsa.fas   | Apiidae           |               |             | <i>Ceratina chalybea</i>           |
| 120707_1249_FCD111GACXX_L3_INSwptTBBRAAPEI-21.tsa.fas   | Apiidae           |               |             | <i>Epeolus variegatus</i>          |
| 130728_1263_FCD23HKACXX_L2_INSoftmTASRAAPEI-84.tsa.fas  | Apiidae           |               |             | <i>Eucera nigrescens</i>           |
| 130919_1247_FCC2V7VACXX_L6_INSinTAORAAPEI-32.tsa.fas    | Apiidae           |               |             | <i>Eucera plumigera</i>            |
| 130919_1247_FCC2V7VACXX_L6_INSinTAXRAAPEI-55.tsa.fas    | Apiidae           |               |             | <i>Eucera syriaca</i>              |
| 120316_1251_FCC0HJ1ACXX_L8_INStmbTANRAAPEI-89.tsa.fas   | Apiidae           |               |             | <i>Euglossa dilemma</i>            |
| 110817_1809_FCD05CDACXX_L3_INSubsTBQRAAPEI-82.tsa.fas   | Apiidae           |               |             | <i>Nomada lathburiana</i>          |
| 121030_1251_FCC19KWACXX_L1_INSeqTDERAAPEI-75.tsa.fas    | Apiidae           |               |             | <i>Tetragonula carbonaria</i>      |
| 120707_1249_FCD111GACXX_L4_INSwptTAYRAAPEI-18.tsa.fas   | Apiidae           |               |             | <i>Tetraloniella sp</i>            |
| 131012_1246_FCC2J5BACXX_L8_INSinTAFRAAPEI-61.tsa.fas    | Apiidae           |               |             | <i>Tetraloniella nigriceps</i>     |
| 131012_1246_FCC2J5BACXX_L8_RINSinITDKRAAPEI-118.tsa.fas | Apiidae           |               |             | <i>Tetraloniella sp</i>            |
| 120215_1277_FCD0KP1ACXX_L7_INSjdsTAORAAPEI-44.tsa.fas   | Apiidae           |               |             | <i>Thyreus orbatus</i>             |
| 110817_1809_FCD05CDACXX_L3_INSubsTBORAAPEI-80.tsa.fas   | Apiidae           |               |             | <i>Xylocopa violacea</i>           |
| 130728_1263_FCD23HKACXX_L1_INSoftmTACRAAPEI-35.tsa.fas  | Apiidae           |               |             | <i>Ammobates syriacus</i>          |
| 110817_1809_FCD05CDACXX_L3_INSubsTBARABPEI-119.tsa.fas  | Colletidae        |               |             | <i>Colletes cucularius</i>         |
| 120707_1249_FCD111GACXX_L2_INSwptTAMRAAPEI-30.tsa.fas   | Colletidae        |               |             | <i>Hylaeus variegatus</i>          |
| 121010_1249_FCD1C4BACXX_L6_INSeqTACRAAPEI-12.tsa.fas    | Crabronidae       | Astatinae     |             | <i>Astata minor</i>                |
| 130919_1247_FCC2V7VACXX_L7_RINSinTBHRAAPEI-136.tsa.fas  | Crabronidae       | Astatinae     |             | <i>Dryodella pinguis</i>           |
| 120429_1266_FCC0HG0ACXX_L8_INSyvTBDRAAPEI-9.tsa.fas     | Crabronidae       | Bembicinae    |             | <i>Alysson spinosus</i>            |
| 120521_1249_FCC0U4RACXX_L7_INSyvTBRAAPEI-11.tsa.fas     | Crabronidae       | Bembicinae    | Bembicini   | <i>Gorytes italicus</i>            |
| 120707_1249_FCD111GACXX_L3_INSwptTAFRAAPEI-16.tsa.fas   | Crabronidae       | Bembicinae    | Bembicini   | <i>Gorytes niger</i>               |
| 120126_1263_FCD0L80ACXX_L2_INSnfrTBORAAPEI-14.tsa.fas   | Crabronidae       | Bembicinae    | Bembecini   | <i>Sphecius convallis</i>          |
| 120429_1266_FCC0HG0ACXX_L8_INSyvTARRAAPEI-44.tsa.fas    | Crabronidae       | Bembicinae    | Bembecini   | <i>Stizina</i>                     |
| 130112_1269_FCC1M19ACXX_L2_INSeqTAGRRAAPEI-55.tsa.fas   | Crabronidae       | Bembicinae    | Bembecini   | <i>Stizoides tridentatus</i>       |
| 120707_1249_FCD111GACXX_L4_INSwptTBNRAAPEI-44.tsa.fas   | Crabronidae       | Bembicinae    | Bembecini   | <i>Stizina</i>                     |
| 120707_1249_FCD111GACXX_L3_INSwptTBRAAPEI-34.tsa.fas    | Crabronidae       | Bembicinae    | Bembecini   | <i>Bembix rostrata</i>             |
| 120707_1249_FCD111GACXX_L4_INSwptTBJRAAPEI-37.tsa.fas   | Crabronidae       | Bembicinae    | Bembecini   | <i>Nyssonina</i>                   |
| 120707_1249_FCD111GACXX_L4_INSwptTBJRAAPEI-37.tsa.fas   | Crabronidae       | Bembicinae    | Bembecini   | <i>Nyssonina</i>                   |
| 120707_1249_FCD111GACXX_L4_INSwptTBJRAAPEI-37.tsa.fas   | Crabronidae       | Bembicinae    | Bembecini   | <i>Bembix rostrata</i>             |
| 121221_1260_FCC1GFFACXX_L3_INSlupTBBRAAPEI-15.tsa.fas   | Crabronidae       | Crabroninae   | Crabronini  | <i>Crabro peltarius</i>            |
| 130728_1263_FCD23HKACXX_L8_INSoftmTBRAAPEI-94.tsa.fas   | Crabronidae       | Crabroninae   | Crabronini  | <i>Crossocerus quadrimaculatus</i> |
| 120707_1249_FCD111GACXX_L4_INSwptTAKRAAPEI-21.tsa.fas   | Crabronidae       | Crabroninae   | Crabronini  | <i>Crabronina</i>                  |
| 130928_1232_FCC2UV4ACXX_L1_RINSinTDERAAPEI-83.tsa.fas   | Crabronidae       | Crabroninae   | Crabronini  | <i>Crabronina</i>                  |
| 120215_1277_FCD0KP1ACXX_L8_INSjdsTBRAAPEI-75.tsa.fas    | Crabronidae       | Crabroninae   | Crabronini  | <i>Lestica clypeata</i>            |
| 130728_1263_FCD23HKACXX_L8_INSoftmTBRAAPEI-94.tsa.fas   | Crabronidae       | Crabroninae   | Larrini     | <i>Lirid sp</i>                    |
| 120707_1249_FCD111GACXX_L4_INSwptTAKRAAPEI-21.tsa.fas   | Crabronidae       | Crabroninae   | Larrini     | <i>Gastrosericina</i>              |
| 130928_1232_FCC2UV4ACXX_L1_RINSinTDERAAPEI-83.tsa.fas   | Crabronidae       | Crabroninae   | Larrini     | <i>Gastrosericina</i>              |
| 120215_1277_FCD0KP1ACXX_L8_INSjdsTBRAAPEI-75.tsa.fas    | Crabronidae       | Crabroninae   | Miscophini  | <i>Tachysphex fulvitaris</i>       |
| 130728_1263_FCD23HKACXX_L8_INSoftmTBRAAPEI-94.tsa.fas   | Crabronidae       | Crabroninae   | Miscophini  | <i>Nitela sp</i>                   |
| 130206_1238_FCC1LVUACXX_L3_INSeqTCLRAAPEI-44.tsa.fas    | Crabronidae       | Crabroninae   | Oxybelini   | <i>Oxybelus bipunctatus</i>        |
| 120429_1266_FCC0HG0ACXX_L8_INSyvTAWRAAPEI-88.tsa.fas    | Crabronidae       | Crabroninae   | Palarini    | <i>Palarus histrio</i>             |
| 120215_1277_FCD0KP1ACXX_L8_INSjdsTAYRAAPEI-43.tsa.fas   | Crabronidae       | Crabroninae   | Trypoxylini | <i>Pison atrum</i>                 |
| 121221_1260_FCC1GFFACXX_L3_INSlupTBBRAAPEI-15.tsa.fas   | Crabronidae       | Crabroninae   | Trypoxylini | <i>Trypoxylon figulus</i>          |
| 120215_1277_FCD0KP1ACXX_L7_INSjdsTBMRAAPEI-88.tsa.fas   | Crabronidae       | Mellininae    |             | <i>Dinetus pictus</i>              |
| 121221_1260_FCC1GFFACXX_L3_INSlupTBBRAAPEI-15.tsa.fas   | Crabronidae       | Mellininae    |             | <i>Mellinus arvensis</i>           |
| 120215_1277_FCD0KP1ACXX_L7_INSjdsTBMRAAPEI-88.tsa.fas   | Crabronidae       | Mellininae    |             | <i>Diodontus minutus</i>           |
| 121221_1260_FCC1GFFACXX_L3_INSlupTBBRAAPEI-15.tsa.fas   | Crabronidae       | Mellininae    |             | <i>Passaloecus eremita</i>         |
| 120521_1249_FCC0U4RACXX_L7_INSyvTBBRAAPEI-95.tsa.fas    | Crabronidae       | Mellininae    |             | <i>Pemphredon lugens</i>           |
| 121221_1260_FCC1GFFACXX_L3_INSlupTBJRAAPEI-30.tsa.fas   | Crabronidae       | Mellininae    |             | <i>Spilomena beata</i>             |
| 120707_1249_FCD111GACXX_L4_INSwptTARRAAPEI-13.tsa.fas   | Crabronidae       | Mellininae    |             | <i>Psenulus fuscipennis</i>        |
| 120725_1247_FCC0WHRACXX_L4_INSwptTBRAAPEI-62.tsa.fas    | Crabronidae       | Mellininae    |             | <i>Philanthus triangulum</i>       |
| 130728_1263_FCD23HKACXX_L8_INSoftmTBQRAAPEI-84.tsa.fas  | Crabronidae       | Mellininae    |             | <i>Philanthus</i>                  |
| 130206_1238_FCC1LVUACXX_L4_INSeqTDBRAAPEI-109.tsa.fas   | Crabronidae       | Mellininae    |             | <i>Pseudoscobia sinaitica</i>      |
| 120521_1249_FCC0U4RACXX_L7_INSyvTBRAAPEI-15.tsa.fas     | Crabronidae       | Mellininae    |             | <i>Dufourea dentiventris</i>       |
| 120707_1249_FCD111GACXX_L1_INSwptTARRAAPEI-17.tsa.fas   | Crabronidae       | Mellininae    |             | <i>Halictus quadrinotatus</i>      |
| 120521_1249_FCC0U4RACXX_L7_INSyvTBJRAAPEI-41.tsa.fas    | Crabronidae       | Mellininae    |             | <i>Lasiosiglossum xanthopus</i>    |
| 130314_1269_FCC1KFEACXX_L7_INSobdTCZRAAPEI-56.tsa.fas   | Crabronidae       | Mellininae    |             | <i>Nomia diversipes</i>            |
| 110817_1809_FCD05CDACXX_L3_INSubsTBPRAAPEI-81.tsa.fas   | Crabronidae       | Mellininae    |             | <i>Nomioides sp.</i>               |
| 120707_1249_FCD111GACXX_L3_INSwptTARRAAPEI-17.tsa.fas   | Crabronidae       | Mellininae    |             | <i>Sphecodes albibrabis</i>        |
| 120707_1249_FCD111GACXX_L4_INSwptTAVRAAPEI-15.tsa.fas   | Crabronidae       | Mellininae    |             | <i>Systropha curvicornis</i>       |
| 120707_1249_FCD111GACXX_L2_INSwptTAHRAAPEI-18.tsa.fas   | Crabronidae       | Mellininae    |             | <i>Anthidium manicatum</i>         |
| 120707_1249_FCD111GACXX_L4_INSwptTBLRAAPEI-41.tsa.fas   | Crabronidae       | Mellininae    |             | <i>Chelostoma florissomme</i>      |
| 120521_1249_FCC0U4RACXX_L7_INSyvTBLRAAPEI-44.tsa.fas    | Crabronidae       | Mellininae    |             | <i>Coelioxys conoidea</i>          |
| 130112_1269_FCC1M19ACXX_L8_INSlupTAWRAAPEI-9.tsa.fas    | Crabronidae       | Mellininae    |             | <i>Dioxys cincta</i>               |
| 120429_1266_FCC0HG0ACXX_L7_INSyvTAORAAPEI-39.tsa.fas    | Crabronidae       | Mellininae    |             | <i>Heriades truncorum</i>          |
| 110817_1809_FCD05CDACXX_L3_INSubsTBFRAAPEI-126.tsa.fas  | Crabronidae       | Mellininae    |             | <i>Lithurgus chrysurus</i>         |
| 120521_1249_FCC0U4RACXX_L7_INSyvTBMRAAPEI-45.tsa.fas    | Crabronidae       | Mellininae    |             | <i>Megachile willughbiella</i>     |
| 121221_1260_FCC1GFFACXX_L3_INSlupTAYRAAPEI-12.tsa.fas   | Crabronidae       | Mellininae    |             | <i>Osmia cornuta</i>               |
| 121221_1260_FCC1GFFACXX_L3_INSlupTAYRAAPEI-12.tsa.fas   | Crabronidae       | Mellitidae    |             | <i>Stelis punctulatisima</i>       |
| 121221_1260_FCC1GFFACXX_L7_INSyvTBORAAPEI-47.tsa.fas    | Crabronidae       | Mellitidae    |             | <i>Dasygaster hirtipes</i>         |
| 121221_1260_FCC1GFFACXX_L8_INSlupTBFRAAPEI-19.tsa.fas   | Crabronidae       | Mellitidae    |             | <i>Macropis fulvipes</i>           |
| 121221_1260_FCC1GFFACXX_L8_INSlupTBFRAAPEI-19.tsa.fas   | Crabronidae       | Mellitidae    |             | <i>Melitta haemorrhoidalis</i>     |
| 120707_1249_FCD111GACXX_L3_INSwptTBRRAAPEI-56.tsa.fas   | Sphecidae s. str. | Ammophilinae  |             | <i>Ammophila sabulosa</i>          |
| 130728_1263_FCD23HKACXX_L3_INSoftmTBRRAAPEI-72.tsa.fas  | Sphecidae s. str. | Ammophilinae  |             | <i>Podalonia hirsuta</i>           |
| 120521_1249_FCC0U4RACXX_L7_INSyvTBORAAPEI-57.tsa.fas    | Sphecidae s. str. | Chloriontinae |             | <i>Chlorion hirtum</i>             |
| 120707_1249_FCD111GACXX_L3_INSwptTBRRAAPEI-56.tsa.fas   | Sphecidae s. str. | Chloriontinae |             | <i>Chalybion californicum</i>      |
| 120707_1249_FCD111GACXX_L3_INSwptTBRRAAPEI-56.tsa.fas   | Sphecidae s. str. | Chloriontinae |             | <i>Chalybion curvatum</i>          |
| 120521_1249_FCC0U4RACXX_L7_INSyvTBRRAAPEI-57.tsa.fas    | Sphecidae s. str. | Chloriontinae |             | <i>Prionyx kirbyi</i>              |
| 120707_1249_FCD111GACXX_L3_INSwptTBRRAAPEI-56.tsa.fas   | Sphecidae s. str. | Chloriontinae |             | <i>Isodontia mexicana</i>          |
| 120429_1266_FCC0HG0ACXX_L7_INSyvTAIRAAPEI-18.tsa.fas    | Sphecidae s. str. | Chloriontinae |             | <i>Sphechus funerarius</i>         |
| 120429_1266_FCC0HG0ACXX_L7_INSyvTABRAAPEI-11.tsa.fas    | Mutillidae        |               |             | <i>Smicromyrme rufipes</i>         |
| 120707_1249_FCD111GACXX_L1_INSwptTABRAAPEI-12.tsa.fas   | Pompilidae        |               |             | <i>Pompilus cinereus</i>           |
| 120521_1249_FCC0U4RACXX_L8_INSyvTBVRAAPEI-84.tsa.fas    | Sapygidae         |               |             | <i>Sapyga quinquepunctata</i>      |
| 120521_1249_FCC0U4RACXX_L8_INSyvTBXRAAPEI-21.tsa.fas    | Scoliidae         |               |             | <i>Colpa sexmaculata</i>           |
| 120429_1266_FCC0HG0ACXX_L7_INSyvTADRAAPEI-13.tsa.fas    | Scoliidae         |               |             | <i>Scolia hirta</i>                |
| 120429_1266_FCC0HG0ACXX_L7_INSyvTAMRAAPEI-36.tsa.fas    | Tiphiidae         |               |             | <i>Tiphia femorata</i>             |

**Additional table S7:** Official gene sets used to assign assembled contigs from enriched DNA libraries and transcriptomes to 3,260 single-copy protein-coding genes.

| Species                      | URL                                                                                                                                   | Files                                                                                                 | Date of Download   |
|------------------------------|---------------------------------------------------------------------------------------------------------------------------------------|-------------------------------------------------------------------------------------------------------|--------------------|
| <i>Acromyrmex echinator</i>  | <a href="http://hymenopteragenome.org/ant_genomes">http://hymenopteragenome.org/ant_genomes</a>                                       | <a href="#">aech_OGSv3.8_pep.fa</a><br><a href="#">aech_OGSv3.8_transcript.fa</a>                     | August 10, 2014    |
| <i>Apis mellifera</i>        | <a href="http://hymenopteragenome.org/beebase/">http://hymenopteragenome.org/beebase/</a>                                             | <a href="#">amel_OGSv3.2_pep.fa</a><br><a href="#">amel_OGSv3.2_cds.fa</a>                            | August 7, 2014     |
| <i>Camponotus floridanus</i> | <a href="http://hymenopteragenome.org/ant_genomes/">http://hymenopteragenome.org/ant_genomes/</a>                                     | <a href="#">cflo_OGSv3.3_pep.fa.gz</a><br><a href="#">cflo_OGSv3.3_transcript.fa.gz</a>               | August 10, 2014    |
| <i>Harpegnathos saltator</i> | <a href="http://hymenopteragenome.org/ant_genomes/">http://hymenopteragenome.org/ant_genomes/</a>                                     | <a href="#">hsal_OGSv3.3_pep.fa</a><br><a href="#">hsal_OGSv3.3_transcript.fa</a>                     | August 10, 2014    |
| <i>Tribolium castaneum</i>   | <a href="http://beetlebase.org">http://beetlebase.org</a>                                                                             | <a href="#">T_castaneum_3_CDS.fa</a><br><a href="#">T_castaneum_3_peptide.fa</a>                      | September 24, 2012 |
| <i>Nasonia vitripennis</i>   | <a href="http://arthropods.eugenes.org/EvidentialGene/nasonia/genes/">http://arthropods.eugenes.org/EvidentialGene/nasonia/genes/</a> | <a href="#">nvit2_evigenes_pub11u.good.aa.gz</a><br><a href="#">nvit2_evigenes_pub11u.good.cds.gz</a> | August 7, 2014     |





**Additional table S9:** Fossils used for time divergence time estimations. Besides the calibration time we also give the prior settings. Mode of preservation: CF - compression fossil; AM - amber. Information about type locality obtained from the database PaleoDB. Ma = million years. Time scale = 100 Ma for lower bound setting.

| Fossil                          | PaleoDB taxon No. | placing node                                                                        | fossil calibration node shown in Additional figure S1 | age range [Ma]                                      | lower bound (tL) | left tail probability [p] | Basis of Age                                                 | Lithology                                                        | Environment | Location            | Phylogenetic / taxonomic justification                                                                                                                                                                                                                                                                                                                                                                                                                                                                                                                                                                                                     | Reference |
|---------------------------------|-------------------|-------------------------------------------------------------------------------------|-------------------------------------------------------|-----------------------------------------------------|------------------|---------------------------|--------------------------------------------------------------|------------------------------------------------------------------|-------------|---------------------|--------------------------------------------------------------------------------------------------------------------------------------------------------------------------------------------------------------------------------------------------------------------------------------------------------------------------------------------------------------------------------------------------------------------------------------------------------------------------------------------------------------------------------------------------------------------------------------------------------------------------------------------|-----------|
| <i>Pison antiquum</i>           | 219890            | Trypoxylini: <i>Pison</i> / <i>Trypoxylan</i>                                       | 4                                                     | 20.43 to 13.65                                      | 0.1365           | 0.025                     | Stratigraphy based                                           | Dominican amber                                                  | terrestrial | OSU H-10-15         | <i>Pison antiquum</i> has not been included in any phylogenetic analysis, nor has any other fossil species in this genus. However, in the original description, Antropov and Pulawski (1996) clearly mentioned diagnostic characters and character combinations, which potentially qualify as apomorphies of <i>Pison</i> in the context of the well-founded placement of the genus in the Trypoxylini and the Larrinae.                                                                                                                                                                                                                   | [1]       |
| <i>Lindenius paleomystax</i>    | 224829            | Crabronina: <i>Lindenius</i> / <i>Crabro</i> / <i>Lesticia</i> / <i>Crossocerus</i> | 3                                                     | 20.43 to 13.65                                      | 0.1365           | 0.025                     | Stratigraphy based                                           | Dominican amber                                                  | terrestrial | AMNH DR-14-1091     | <i>Lindenius paleomystax</i> has not been included in any published phylogenetic analysis, nor has any other fossil species in this genus. However, in the original description, Bennett and Engel (2006) clearly mentioned diagnostic characters and character combinations, which potentially qualify as apomorphies of <i>Lindenius</i> in the context of the well-founded placement of the genus in the Crabronini and the Crabroninae. Additionally, the species has been compared with the result of a cladistic analysis of the Crabronini and its generic placement has been confirmed (unpublished PhD, thesis D. Bennett, 2010). | [2]       |
| <i>Passaloecus microceras</i>   | 255469            | Pemphredonina: <i>Polemistus</i> / <i>Passaloecus</i>                               | 7                                                     | 58 to 34 (age of Baltic amber problematic) [10, 11] | 0.34             | 0.025                     | Stratigraphy based and K-Ar dates                            | Baltic amber                                                     | terrestrial | Kaliningrad         | <i>Passaloecus microceras</i> has not been included in any phylogenetic analysis, nor has any other fossil species in this genus. However, in the original description, Sorg (1986) clearly mentioned diagnostic characters and character combinations, which potentially qualify as apomorphies of <i>Passaloecus</i> in the context of the well-founded placement of the genus in the Pemphredonini and the Pemphredoninae. These characters have been used in a cladistic analysis of the Pemphredoninae by Antropov (2011) and their phylogenetic significance has been confirmed.                                                     | [3]       |
| <i>Psammaecius sepultus</i>     | 320781            | Sphecina / Gorytina                                                                 | 5                                                     | 37.2 to 33.9                                        | 0.339            | 0.025                     | Stratigraphy based                                           | Chadronian lacustrine                                            | terrestrial | Florissant MCZ 2019 | The original description of <i>Psammaecius sepultus</i> (in <i>Hoplisis</i> ) left many open questions. The specimen was redescribed by Pulawski and Rasnitsyn (1980) in great detail. They also presented a detailed discussion of the placement in the family, tribe and genus. Although fossil bembecines have been neglected in all cladistic analyses of the Bembecinae, the significance of the characters to support placement of the fossil in the Gorytini can be confirmed.                                                                                                                                                      | [4]       |
| <i>Hoplisidea kohliana</i>      | 179708            | Chlorioninae / Sceliphirini / Podlani                                               | 2                                                     | 37.2 to 33.9                                        | 0.339            | 0.025                     | Stratigraphy based                                           | Chadronian lacustrine                                            | terrestrial | Florissant MCZ 2018 | Menke and Rasnitsyn (1987) restudied the holotype of <i>Hoplisidea kohliana</i> . They discussed potential affinities within apoid wasps, although without rigorous cladistic methods. They concluded that a placement within Sceliphirinae is most likely based on significant similarities in the wing venation.                                                                                                                                                                                                                                                                                                                         | [4]       |
| <i>Psolomena electra</i>        | 227250            | Spilomenina / Stigmina / Pemphredonina                                              | 6                                                     | 94.3 to 89.3                                        | 0.893            | 0.025                     | Stratigraphy based                                           | White Oaks Pit (Old Crossman's Clay Pits)                        | terrestrial | AMNH NJ-268         | <i>Psolomena electra</i> has been included in phylogenetic analysis of the Pemphredoninae by Antropov (2011) and its placement in the Spilomenini has been confirmed.                                                                                                                                                                                                                                                                                                                                                                                                                                                                      | [5]       |
| <i>Cretampulex gracilis</i>     | 255374            | Apoidea                                                                             | 1                                                     | 98.79 ± 0.62                                        | 0.982            | 0.025                     | 206Pb/238U [12]                                              | Burmese amber                                                    | terrestrial | NHM In. 19123(5)    | The position of <i>Cretampulex gracilis</i> has been discussed in detail by the original author (Antropov 2000). Later, the species was included in an overview discussion on the fossil Ampulicidae, and the relevant characters were used in a cladistic analysis of the Ampulicidae (Ohi and Spahn 2010).                                                                                                                                                                                                                                                                                                                               | [6]       |
| <i>Melittosphex burmensis</i>   | 213427            | Ammoplanina / Anthophila                                                            | 8                                                     | 98.79 ± 0.62                                        | 0.982            | 0.025                     | 206Pb/238U [12]                                              | Burmese amber                                                    | terrestrial | Poinar collection   | <i>Melittosphex burmensis</i> is usually seen as the oldest known representative of the bees (Anthophila). This has been emphasized by the original authors, who particularly emphasized the presence of plumose hairs as one of the unique apomorphies of the bees within Apoidea. The species has also been used in an intuitive calibration of a cladogram of the relationships within Apoidea by Ohi and Engel (2007).                                                                                                                                                                                                                 | [7]       |
| <i>Paleoamacropis oecenicus</i> | 227437            | Bombini / Meliponini                                                                | 9                                                     | 53 to 50                                            | 0.5              | 0.025                     | Spamian, level MP7 of the mammalian fauna of Dormaal [13,14] | Oise amber                                                       | terrestrial | MNHN PA 3190        | In the description of this species, the authors list a number of characters that allow placement of the fossil in Macropodinae (some of them are listed here in the "apomorphies" column). They, however, also list some characters that this species shares with other melitid genera. For details, refer to Michez et al. 2007                                                                                                                                                                                                                                                                                                           | [8]       |
| <i>Paleoepolus micheneri</i>    | 355783            | Ammobatini / Epeolini                                                               | 10                                                    | 61 to 60                                            | 0.6              | 0.025                     | Pollen analysis and radiometric K/Ar analysis [15]           | Thanetian crater lake diatomite in the Menat Formation of France | terrestrial | Menat (MNHN coll)   |                                                                                                                                                                                                                                                                                                                                                                                                                                                                                                                                                                                                                                            | [9]       |

**References:**

- [1] - Antropov AV and Pulawski WJ (1996). *Pison antiquum*, a new species from Dominican amber (Hymenoptera: Sphecidae). *Journal of Hymenoptera Research* 5, 16–21.
- [2] - Bennett DJ and Engel MS (2006). A new moustache wasp in Dominican amber, with an account of apoid wasp evolution emphasizing Crabroninae (Hymenoptera: Crabronidae). *American Museum Novitates* 3529, 1–10.
- [3] - Sorg M (1986). Grabwespen der Gattung *Passaloecus* aus fossilen Harzen (Hymenoptera, Sphecidae, Pemphredoninae). *Paläontologische Zeitschrift* 60, 277–284.
- [4] - Rohwer SA, Brues CT, Cockerell TDA, Expeditions F, Cockerell WP, Wheeler WM (1906). Fossil parasitic and phytophagous Hymenoptera from Florissant, Colorado. *American Museum of Natural History* 22, 491–498.
- [5] - Antropov AV (2000). A new digger wasp (Hymenoptera, Sphecidae, Pemphredoninae) from New Jersey amber. In: *Studies on fossils in amber, with particular reference to the Cretaceous of New Jersey* (D. Grimaldi, ed.) pp. 339–343. Back: Leiden.
- [6] - Antropov AV (2000). Digger wasps (Hymenoptera, Sphecidae) in Burmese amber. *Bulletin of the Natural History Museum, Geology Series* 56, 59–77.
- [7] - Poinar GO and Danforth BN (2006). A fossil bee from Early Cretaceous Burmese amber. *Science* 314, 614–614.
- [8] - Michez D, Nel A, Memier JJ, Rasmont P (2007). The oldest fossil of a melitid bee (Hymenoptera: Apoiformes) from the early Eocene of Oise (France). *Zool. J. Linn. Soc.* 250, 701–709.
- [9] - Dehon M, Engel MS, Michez D (2017). Systematics, in Antiquity of cleptoparasitism among bees revealed by morphometric and phylogenetic analysis of a Palaeocene fossil nomadine (Hymenoptera: Apoidea). *Systematic Entomology* 42:543-554.
- [10] - Dlussky GM, Rasnitsyn AP (2009). Ants (Insecta: Vespida: Formicidae) in the Upper Eocene Amber of Central and Eastern Europe. *Paleontol. J.* 43, 1024–1042.
- [11] - Standke G (2008). Bitterfelder Bernstein gleich Baltischer Bernstein? – Eine geologische Raum- Zeit- Betrachtung und genetische Schlussfolgerungen. *Exkurs.f. und Veröfftl. DGG* 236, 11–33.
- [12] - Shi Guanghai et al. (2012). Age constraint on Burmese amber based on U–Pb dating of zircons. *Cretaceous research*, 37, 155–163.
- [13] - Feuguere L (1963). L'Yprésien du Bassin de Paris. *Essai de Monographie Stratigraphique* (Paris: Imprimerie nationale).
- [14] - Nel A, de Plöeg G, Dejaj J, Duthell D, de Franceschi D, Gheerbrant E, Godinot M, Hervet S, Memier JJ, Augé M, et al. (1999). Un gisement sparnacien exceptionnel à plantes, arthropodes et vertébrés (Éocène basal, MP7): Le Quesnoy (Oise, France). *C. R. Acad. Sci., Ser. IIa: Sci. Terre Planets* 329, 65–72.
- [15] - Wappler T, Currano ED, Wilf P, Rust J, Labandeira CC (2009). No post-Cretaceous ecosystem depression in European forests? Rich insect-feeding damage on diverse middle Palaeocene plants, Menat, France. *Proceedings of the Royal Society of London B: Biological Sciences*, 276(1677), 4271–4277.

**Additional table S10.** Four-cluster Likelihood (F<sub>cl</sub>M) results on amino acid and nucleotide level when testing the phylogenetic placement of Ammoplanina and Mellininae. Proportions of quartets that map into areas respective areas in the 2D-simplex graph. T1: unambiguous support for G1,G2 – G3,G4. T2: unambiguous support for G1,G3 – G2,G4. T3: unambiguous support for G1,G4 – G2,G3. Quartets falling into the areas T1, T2 and T3 are informative. Areas T12, T23 and T13 are partly informative, and area T\* is not informative.

| <b>Hypothesis 1: Does F<sub>cl</sub>M support a sister group relationship between Ammoplanina and Anthophila (bees)?</b> |                          |                 |                 |       |      |       |       |
|--------------------------------------------------------------------------------------------------------------------------|--------------------------|-----------------|-----------------|-------|------|-------|-------|
| possible unambiguous topologies:                                                                                         |                          |                 |                 |       |      |       |       |
| T1: Anthophila,Ammoplanina   Psenini + Odontosphecini,rem_apoid_wasps_outgroups                                          |                          |                 |                 |       |      |       |       |
| T2: Anthophila,Psenini + Odontosphecini   Ammoplanina,rem_apoid_wasps_outgroups                                          |                          |                 |                 |       |      |       |       |
| T3: Anthophila,rem_apoid_wasps_outgroups   Ammoplanina,Psenini + Odontosphecini                                          |                          |                 |                 |       |      |       |       |
| Result on amino-acid level                                                                                               | T1: G1,G2 G3,G4 (area 1) | T2: G1,G3 G2,G4 | T3: G1,G4 G2,G3 | T1T2  | T1T3 | T2T3  | T*    |
| original                                                                                                                 | 38,0%                    | 15,0%           | 40,0%           | 2,0%  | 3,0% | 1,0%  | 1,0%  |
| permutation I                                                                                                            | 7,0%                     | 5,0%            | 9,0%            | 8,0%  | 9,0% | 10,0% | 53,0% |
| permutation II                                                                                                           | 2,0%                     | 1,0%            | 3,0%            | 4,0%  | 6,0% | 5,0%  | 78,0% |
| permutation III                                                                                                          | 0,0%                     | 0,0%            | 0,0%            | 0,0%  | 0,0% | 0,0%  | 99,0% |
| Result on nucleotide level                                                                                               | T1: G1,G2 G3,G4 (area 1) | T2: G1,G3 G2,G4 | T3: G1,G4 G2,G3 | T1T2  | T1T3 | T2T3  | T*    |
| original                                                                                                                 | 54,0%                    | 9,0%            | 34,0%           | 1,0%  | 2,0% | 0,0%  | 0,0%  |
| permutation I                                                                                                            | 20,0%                    | 6,0%            | 14,0%           | 10,0% | 9,0% | 12,0% | 28,0% |
| permutation II                                                                                                           | 4,0%                     | 2,0%            | 2,0%            | 5,0%  | 5,0% | 6,0%  | 76,0% |
| permutation III                                                                                                          | 2,0%                     | 1,0%            | 1,0%            | 4,0%  | 5,0% | 5,0%  | 82,0% |
| <b>Hypothesis 2: Does F<sub>cl</sub>M support the position of Mellininae as sister to Sphecidae?</b>                     |                          |                 |                 |       |      |       |       |
| possible unambiguous topologies:                                                                                         |                          |                 |                 |       |      |       |       |
| T1: Mellininae,Sphecidae   Crabroninae+Dinetinae,rem_apoid_wasps_bees_outgroups                                          |                          |                 |                 |       |      |       |       |
| T2: Mellininae,Crabroninae+Dinetinae   Sphecidae,rem_apoid_wasps_bees_outgroups                                          |                          |                 |                 |       |      |       |       |
| T3: Mellininae,rem_apoid_wasps_bees_outgroups   Sphecidae,Crabroninae+Dinetinae                                          |                          |                 |                 |       |      |       |       |
| Result on amino-acid level                                                                                               | T1: G1,G2 G3,G4 (area 1) | T2: G1,G3 G2,G4 | T3: G1,G4 G2,G3 | T1T2  | T1T3 | T2T3  | T*    |
| original                                                                                                                 | 21,0%                    | 21,0%           | 52,0%           | 1,0%  | 2,0% | 2,0%  | 1,0%  |
| permutation I                                                                                                            | 8,0%                     | 8,0%            | 7,0%            | 8,0%  | 9,0% | 12,0% | 48,0% |
| permutation II                                                                                                           | 1,0%                     | 1,0%            | 2,0%            | 2,0%  | 2,0% | 3,0%  | 89,0% |
| permutation III                                                                                                          | 0,0%                     | 0,0%            | 0,0%            | 0,0%  | 0,0% | 0,0%  | 99,0% |
| Result on nucleotide level                                                                                               | T1: G1,G2 G3,G4 (area 1) | T2: G1,G3 G2,G4 | T3: G1,G4 G2,G3 | T1T2  | T1T3 | T2T3  | T*    |
| original                                                                                                                 | 24,0%                    | 20,0%           | 53,0%           | 0,0%  | 1,0% | 1,0%  | 0,0%  |
| permutation I                                                                                                            | 28,0%                    | 8,0%            | 10,0%           | 7,0%  | 6,0% | 24,0% | 18,0% |
| permutation II                                                                                                           | 1,0%                     | 3,0%            | 2,0%            | 4,0%  | 4,0% | 8,0%  | 78,0% |
| permutation III                                                                                                          | 2,0%                     | 1,0%            | 2,0%            | 4,0%  | 4,0% | 6,0%  | 82,0% |
