# Supplementary material for: Phylogenomic analysis of Apoidea sheds new light on the sister group of bees
Source: PubMed Central journal article supplement (PMC5960199; doi:10.1186/s12862-018-1155-8), 2018-05-18
Supplement: 12862_2018_1155_MOESM3_ESM.pdf [file 12862_2018_1155_MOESM3_ESM.pdf]

**Additional table 1:** Information on grouping of species in a given quartet when assessing the phylogenetic position of *Amnophila* (two species) and *Mellicta* (one species) based on analysing the amino acid supermatrix and nucleotide supermatrix including all three codon positions via Four-cluster Likelihood Mapping (F-CLM).

| Hypothesis 1 - Position Amnophila |                                                                                                                                                                                                                                                                                                                                                                                                                                                                                                                                                                                                                                                                                                                                                                                                                                                                                                                                                                                                                                                                                                                                                                                                                                                                                                                                                                                                                                                                                                                                                                                                                                                                                                                                                                                                                                                                                                                                                                                                                                                                                                                                                                                                                                                                                                                                                                                                                                                                                                                                                                                                                                                                                                                                                                                                                                                                                                                                                                                                                                                                                                                                                                                                                                                                                                                                                                                                                                                                                                                                                                                                                                                                              | Hypothesis 2 - Position Mellicta |                                                                                                                                                                                                                                                                                                                                                                                                                                                                                                                                                                                                                                                                                                                                                                                                                                                                                                                                                                                                                                                                                                                                                                                                                                                                                                                                                                                                                                                                                                                                                                                                                                                                                                                                                                                                                                                                                                                                                                                                                                                                                                                                                                                                                                                                                                                                                                                                                                                                                                                                                                                                                                                                                                                                                                                                                                                                                                                                                                                                                                                                                                                                                                                                                                                                                                                                                                                                                                                                                                                                                                                                                                                                                                                                                                                                                                                                                                                                                                                                                                                                                                                                                  |
|-----------------------------------|------------------------------------------------------------------------------------------------------------------------------------------------------------------------------------------------------------------------------------------------------------------------------------------------------------------------------------------------------------------------------------------------------------------------------------------------------------------------------------------------------------------------------------------------------------------------------------------------------------------------------------------------------------------------------------------------------------------------------------------------------------------------------------------------------------------------------------------------------------------------------------------------------------------------------------------------------------------------------------------------------------------------------------------------------------------------------------------------------------------------------------------------------------------------------------------------------------------------------------------------------------------------------------------------------------------------------------------------------------------------------------------------------------------------------------------------------------------------------------------------------------------------------------------------------------------------------------------------------------------------------------------------------------------------------------------------------------------------------------------------------------------------------------------------------------------------------------------------------------------------------------------------------------------------------------------------------------------------------------------------------------------------------------------------------------------------------------------------------------------------------------------------------------------------------------------------------------------------------------------------------------------------------------------------------------------------------------------------------------------------------------------------------------------------------------------------------------------------------------------------------------------------------------------------------------------------------------------------------------------------------------------------------------------------------------------------------------------------------------------------------------------------------------------------------------------------------------------------------------------------------------------------------------------------------------------------------------------------------------------------------------------------------------------------------------------------------------------------------------------------------------------------------------------------------------------------------------------------------------------------------------------------------------------------------------------------------------------------------------------------------------------------------------------------------------------------------------------------------------------------------------------------------------------------------------------------------------------------------------------------------------------------------------------------------|----------------------------------|--------------------------------------------------------------------------------------------------------------------------------------------------------------------------------------------------------------------------------------------------------------------------------------------------------------------------------------------------------------------------------------------------------------------------------------------------------------------------------------------------------------------------------------------------------------------------------------------------------------------------------------------------------------------------------------------------------------------------------------------------------------------------------------------------------------------------------------------------------------------------------------------------------------------------------------------------------------------------------------------------------------------------------------------------------------------------------------------------------------------------------------------------------------------------------------------------------------------------------------------------------------------------------------------------------------------------------------------------------------------------------------------------------------------------------------------------------------------------------------------------------------------------------------------------------------------------------------------------------------------------------------------------------------------------------------------------------------------------------------------------------------------------------------------------------------------------------------------------------------------------------------------------------------------------------------------------------------------------------------------------------------------------------------------------------------------------------------------------------------------------------------------------------------------------------------------------------------------------------------------------------------------------------------------------------------------------------------------------------------------------------------------------------------------------------------------------------------------------------------------------------------------------------------------------------------------------------------------------------------------------------------------------------------------------------------------------------------------------------------------------------------------------------------------------------------------------------------------------------------------------------------------------------------------------------------------------------------------------------------------------------------------------------------------------------------------------------------------------------------------------------------------------------------------------------------------------------------------------------------------------------------------------------------------------------------------------------------------------------------------------------------------------------------------------------------------------------------------------------------------------------------------------------------------------------------------------------------------------------------------------------------------------------------------------------------------------------------------------------------------------------------------------------------------------------------------------------------------------------------------------------------------------------------------------------------------------------------------------------------------------------------------------------------------------------------------------------------------------------------------------------------------------|
| Group                             | Taxonomic category (according to Pavesi's Catalog of Sphecinae 2016)                                                                                                                                                                                                                                                                                                                                                                                                                                                                                                                                                                                                                                                                                                                                                                                                                                                                                                                                                                                                                                                                                                                                                                                                                                                                                                                                                                                                                                                                                                                                                                                                                                                                                                                                                                                                                                                                                                                                                                                                                                                                                                                                                                                                                                                                                                                                                                                                                                                                                                                                                                                                                                                                                                                                                                                                                                                                                                                                                                                                                                                                                                                                                                                                                                                                                                                                                                                                                                                                                                                                                                                                         | Group                            | Taxonomic category (according to Pavesi's Catalog of Sphecinae 2016)                                                                                                                                                                                                                                                                                                                                                                                                                                                                                                                                                                                                                                                                                                                                                                                                                                                                                                                                                                                                                                                                                                                                                                                                                                                                                                                                                                                                                                                                                                                                                                                                                                                                                                                                                                                                                                                                                                                                                                                                                                                                                                                                                                                                                                                                                                                                                                                                                                                                                                                                                                                                                                                                                                                                                                                                                                                                                                                                                                                                                                                                                                                                                                                                                                                                                                                                                                                                                                                                                                                                                                                                                                                                                                                                                                                                                                                                                                                                                                                                                                                                             |
| 1                                 | Anthophila (bees)                                                                                                                                                                                                                                                                                                                                                                                                                                                                                                                                                                                                                                                                                                                                                                                                                                                                                                                                                                                                                                                                                                                                                                                                                                                                                                                                                                                                                                                                                                                                                                                                                                                                                                                                                                                                                                                                                                                                                                                                                                                                                                                                                                                                                                                                                                                                                                                                                                                                                                                                                                                                                                                                                                                                                                                                                                                                                                                                                                                                                                                                                                                                                                                                                                                                                                                                                                                                                                                                                                                                                                                                                                                            | 1                                | Mellictae                                                                                                                                                                                                                                                                                                                                                                                                                                                                                                                                                                                                                                                                                                                                                                                                                                                                                                                                                                                                                                                                                                                                                                                                                                                                                                                                                                                                                                                                                                                                                                                                                                                                                                                                                                                                                                                                                                                                                                                                                                                                                                                                                                                                                                                                                                                                                                                                                                                                                                                                                                                                                                                                                                                                                                                                                                                                                                                                                                                                                                                                                                                                                                                                                                                                                                                                                                                                                                                                                                                                                                                                                                                                                                                                                                                                                                                                                                                                                                                                                                                                                                                                        |
|                                   | <ul style="list-style-type: none"> <li><i>Amnophila_ynaxus</i></li> <li><i>Andrena_venia</i></li> <li><i>Andrena_mancatum</i></li> <li><i>Anthophora_pumilus</i></li> <li><i>Apis_mellifica</i></li> <li><i>Apis_mellifera</i></li> <li><i>Bombus_agrorum</i></li> <li><i>Camptopoeum_saxorum</i></li> <li><i>Carallia_olubra</i></li> <li><i>Chalcidoma_forsmanni</i></li> <li><i>Chalcidius_circulata</i></li> <li><i>Colletes_corticaria</i></li> <li><i>Stenobothrus</i></li> <li><i>Diapriidae</i></li> <li><i>Diaprius_furcatus</i></li> <li><i>Diaprius_urticae</i></li> <li><i>Dufourea_dierkeana</i></li> <li><i>Epeolus_variegatus</i></li> <li><i>Eucera_ignita</i></li> <li><i>Eucera_silvatica</i></li> <li><i>Eucera_venusta</i></li> <li><i>Euphranta_ahenea</i></li> <li><i>Halictus_quadricinctus</i></li> <li><i>Halictus_turonorum</i></li> <li><i>Hyalela_variegata</i></li> <li><i>Lasioglossum_seriopos</i></li> <li><i>Lithurgus_orthocentrus</i></li> <li><i>Macropis_fulvipes</i></li> <li><i>Megachile_urticae</i></li> <li><i>Melitta_haemorrhoidalis</i></li> <li><i>Nomada_laticornis</i></li> <li><i>Nomada_oversipax</i></li> <li><i>Nomada_sp</i></li> <li><i>Osmia_cornuta</i></li> <li><i>Parasitica_dentipes</i></li> <li><i>Sphecopterus</i></li> <li><i>Stelis_punctulata</i></li> <li><i>Synsphyrapoda</i></li> <li><i>Tetragonula_cantonaria</i></li> <li><i>Tetragonula_melanura</i></li> <li><i>Tetragonula_ignita</i></li> <li><i>Tetragonula_sp</i></li> <li><i>Thyreoxenus</i></li> <li><i>Xylocopa_villosa</i></li> </ul>                                                                                                                                                                                                                                                                                                                                                                                                                                                                                                                                                                                                                                                                                                                                                                                                                                                                                                                                                                                                                                                                                                                                                                                                                                                                                                                                                                                                                                                                                                                                                                                                                                                                                                                                                                                                                                                                                                                                                                                                                                                                                                       | 2                                | Sphicoidea                                                                                                                                                                                                                                                                                                                                                                                                                                                                                                                                                                                                                                                                                                                                                                                                                                                                                                                                                                                                                                                                                                                                                                                                                                                                                                                                                                                                                                                                                                                                                                                                                                                                                                                                                                                                                                                                                                                                                                                                                                                                                                                                                                                                                                                                                                                                                                                                                                                                                                                                                                                                                                                                                                                                                                                                                                                                                                                                                                                                                                                                                                                                                                                                                                                                                                                                                                                                                                                                                                                                                                                                                                                                                                                                                                                                                                                                                                                                                                                                                                                                                                                                       |
|                                   |                                                                                                                                                                                                                                                                                                                                                                                                                                                                                                                                                                                                                                                                                                                                                                                                                                                                                                                                                                                                                                                                                                                                                                                                                                                                                                                                                                                                                                                                                                                                                                                                                                                                                                                                                                                                                                                                                                                                                                                                                                                                                                                                                                                                                                                                                                                                                                                                                                                                                                                                                                                                                                                                                                                                                                                                                                                                                                                                                                                                                                                                                                                                                                                                                                                                                                                                                                                                                                                                                                                                                                                                                                                                              |                                  | <ul style="list-style-type: none"> <li><i>Mellicta_venusta</i></li> <li><i>Amnophila_mellicta</i></li> <li><i>Amnophila_sp1</i></li> <li><i>Amnophila_sp2</i></li> <li><i>Chalybion_californicum</i></li> <li><i>Chalybion_sp1</i></li> <li><i>Chalybion_sp2</i></li> <li><i>Chlorion_ferum</i></li> <li><i>Chlorion_sp1</i></li> <li><i>Dynastes_burmeisteri</i></li> <li><i>Entomophila_melanaria</i></li> <li><i>Isodonia_meliciana</i></li> <li><i>Panurginus</i></li> <li><i>Panurginus_furcatus</i></li> <li><i>Podalonia_hirata</i></li> <li><i>Podalonia_sp</i></li> <li><i>Phryna_hirta</i></li> <li><i>Phryna_sulcatata</i></li> <li><i>Phryna_sulcatata</i></li> <li><i>Sulphitron_curvatum</i></li> <li><i>Sphex_furcatus</i></li> <li><i>Sphex_furcatus2</i></li> <li><i>Sphex_furcatus3</i></li> <li><i>Sphex_furcatus4</i></li> <li><i>Sphex_furcatus5</i></li> <li><i>Sphex_furcatus6</i></li> <li><i>Sphex_furcatus7</i></li> <li><i>Sphex_furcatus8</i></li> <li><i>Sphex_furcatus9</i></li> <li><i>Sphex_furcatus10</i></li> <li><i>Sphex_furcatus11</i></li> <li><i>Sphex_furcatus12</i></li> <li><i>Sphex_furcatus13</i></li> <li><i>Sphex_furcatus14</i></li> <li><i>Sphex_furcatus15</i></li> <li><i>Sphex_furcatus16</i></li> <li><i>Sphex_furcatus17</i></li> <li><i>Sphex_furcatus18</i></li> <li><i>Sphex_furcatus19</i></li> <li><i>Sphex_furcatus20</i></li> <li><i>Sphex_furcatus21</i></li> <li><i>Sphex_furcatus22</i></li> <li><i>Sphex_furcatus23</i></li> <li><i>Sphex_furcatus24</i></li> <li><i>Sphex_furcatus25</i></li> <li><i>Sphex_furcatus26</i></li> <li><i>Sphex_furcatus27</i></li> <li><i>Sphex_furcatus28</i></li> <li><i>Sphex_furcatus29</i></li> <li><i>Sphex_furcatus30</i></li> <li><i>Sphex_furcatus31</i></li> <li><i>Sphex_furcatus32</i></li> <li><i>Sphex_furcatus33</i></li> <li><i>Sphex_furcatus34</i></li> <li><i>Sphex_furcatus35</i></li> <li><i>Sphex_furcatus36</i></li> <li><i>Sphex_furcatus37</i></li> <li><i>Sphex_furcatus38</i></li> <li><i>Sphex_furcatus39</i></li> <li><i>Sphex_furcatus40</i></li> <li><i>Sphex_furcatus41</i></li> <li><i>Sphex_furcatus42</i></li> <li><i>Sphex_furcatus43</i></li> <li><i>Sphex_furcatus44</i></li> <li><i>Sphex_furcatus45</i></li> <li><i>Sphex_furcatus46</i></li> <li><i>Sphex_furcatus47</i></li> <li><i>Sphex_furcatus48</i></li> <li><i>Sphex_furcatus49</i></li> <li><i>Sphex_furcatus50</i></li> <li><i>Sphex_furcatus51</i></li> <li><i>Sphex_furcatus52</i></li> <li><i>Sphex_furcatus53</i></li> <li><i>Sphex_furcatus54</i></li> <li><i>Sphex_furcatus55</i></li> <li><i>Sphex_furcatus56</i></li> <li><i>Sphex_furcatus57</i></li> <li><i>Sphex_furcatus58</i></li> <li><i>Sphex_furcatus59</i></li> <li><i>Sphex_furcatus60</i></li> <li><i>Sphex_furcatus61</i></li> <li><i>Sphex_furcatus62</i></li> <li><i>Sphex_furcatus63</i></li> <li><i>Sphex_furcatus64</i></li> <li><i>Sphex_furcatus65</i></li> <li><i>Sphex_furcatus66</i></li> <li><i>Sphex_furcatus67</i></li> <li><i>Sphex_furcatus68</i></li> <li><i>Sphex_furcatus69</i></li> <li><i>Sphex_furcatus70</i></li> <li><i>Sphex_furcatus71</i></li> <li><i>Sphex_furcatus72</i></li> <li><i>Sphex_furcatus73</i></li> <li><i>Sphex_furcatus74</i></li> <li><i>Sphex_furcatus75</i></li> <li><i>Sphex_furcatus76</i></li> <li><i>Sphex_furcatus77</i></li> <li><i>Sphex_furcatus78</i></li> <li><i>Sphex_furcatus79</i></li> <li><i>Sphex_furcatus80</i></li> <li><i>Sphex_furcatus81</i></li> <li><i>Sphex_furcatus82</i></li> <li><i>Sphex_furcatus83</i></li> <li><i>Sphex_furcatus84</i></li> <li><i>Sphex_furcatus85</i></li> <li><i>Sphex_furcatus86</i></li> <li><i>Sphex_furcatus87</i></li> <li><i>Sphex_furcatus88</i></li> <li><i>Sphex_furcatus89</i></li> <li><i>Sphex_furcatus90</i></li> <li><i>Sphex_furcatus91</i></li> <li><i>Sphex_furcatus92</i></li> <li><i>Sphex_furcatus93</i></li> <li><i>Sphex_furcatus94</i></li> <li><i>Sphex_furcatus95</i></li> <li><i>Sphex_furcatus96</i></li> <li><i>Sphex_furcatus97</i></li> <li><i>Sphex_furcatus98</i></li> <li><i>Sphex_furcatus99</i></li> <li><i>Sphex_furcatus100</i></li> </ul> |
| 2                                 | Amnophila                                                                                                                                                                                                                                                                                                                                                                                                                                                                                                                                                                                                                                                                                                                                                                                                                                                                                                                                                                                                                                                                                                                                                                                                                                                                                                                                                                                                                                                                                                                                                                                                                                                                                                                                                                                                                                                                                                                                                                                                                                                                                                                                                                                                                                                                                                                                                                                                                                                                                                                                                                                                                                                                                                                                                                                                                                                                                                                                                                                                                                                                                                                                                                                                                                                                                                                                                                                                                                                                                                                                                                                                                                                                    | 3                                | Crabroninae + Dinidiinae                                                                                                                                                                                                                                                                                                                                                                                                                                                                                                                                                                                                                                                                                                                                                                                                                                                                                                                                                                                                                                                                                                                                                                                                                                                                                                                                                                                                                                                                                                                                                                                                                                                                                                                                                                                                                                                                                                                                                                                                                                                                                                                                                                                                                                                                                                                                                                                                                                                                                                                                                                                                                                                                                                                                                                                                                                                                                                                                                                                                                                                                                                                                                                                                                                                                                                                                                                                                                                                                                                                                                                                                                                                                                                                                                                                                                                                                                                                                                                                                                                                                                                                         |
|                                   | <ul style="list-style-type: none"> <li><i>Amnophila_sp1</i></li> </ul>                                                                                                                                                                                                                                                                                                                                                                                                                                                                                                                                                                                                                                                                                                                                                                                                                                                                                                                                                                                                                                                                                                                                                                                                                                                                                                                                                                                                                                                                                                                                                                                                                                                                                                                                                                                                                                                                                                                                                                                                                                                                                                                                                                                                                                                                                                                                                                                                                                                                                                                                                                                                                                                                                                                                                                                                                                                                                                                                                                                                                                                                                                                                                                                                                                                                                                                                                                                                                                                                                                                                                                                                       |                                  | <ul style="list-style-type: none"> <li><i>Balotricus_sp1</i></li> <li><i>Crabro</i></li> <li><i>Crabro_sp1</i></li> <li><i>Crabro_sp2</i></li> <li><i>Crabro_sp3</i></li> <li><i>Crabro_sp4</i></li> <li><i>Crabro_sp5</i></li> <li><i>Crabro_sp6</i></li> <li><i>Crabro_sp7</i></li> <li><i>Crabro_sp8</i></li> <li><i>Crabro_sp9</i></li> <li><i>Crabro_sp10</i></li> <li><i>Crabro_sp11</i></li> <li><i>Crabro_sp12</i></li> <li><i>Crabro_sp13</i></li> <li><i>Crabro_sp14</i></li> <li><i>Crabro_sp15</i></li> <li><i>Crabro_sp16</i></li> <li><i>Crabro_sp17</i></li> <li><i>Crabro_sp18</i></li> <li><i>Crabro_sp19</i></li> <li><i>Crabro_sp20</i></li> <li><i>Crabro_sp21</i></li> <li><i>Crabro_sp22</i></li> <li><i>Crabro_sp23</i></li> <li><i>Crabro_sp24</i></li> <li><i>Crabro_sp25</i></li> <li><i>Crabro_sp26</i></li> <li><i>Crabro_sp27</i></li> <li><i>Crabro_sp28</i></li> <li><i>Crabro_sp29</i></li> <li><i>Crabro_sp30</i></li> <li><i>Crabro_sp31</i></li> <li><i>Crabro_sp32</i></li> <li><i>Crabro_sp33</i></li> <li><i>Crabro_sp34</i></li> <li><i>Crabro_sp35</i></li> <li><i>Crabro_sp36</i></li> <li><i>Crabro_sp37</i></li> <li><i>Crabro_sp38</i></li> <li><i>Crabro_sp39</i></li> <li><i>Crabro_sp40</i></li> <li><i>Crabro_sp41</i></li> <li><i>Crabro_sp42</i></li> <li><i>Crabro_sp43</i></li> <li><i>Crabro_sp44</i></li> <li><i>Crabro_sp45</i></li> <li><i>Crabro_sp46</i></li> <li><i>Crabro_sp47</i></li> <li><i>Crabro_sp48</i></li> <li><i>Crabro_sp49</i></li> <li><i>Crabro_sp50</i></li> <li><i>Crabro_sp51</i></li> <li><i>Crabro_sp52</i></li> <li><i>Crabro_sp53</i></li> <li><i>Crabro_sp54</i></li> <li><i>Crabro_sp55</i></li> <li><i>Crabro_sp56</i></li> <li><i>Crabro_sp57</i></li> <li><i>Crabro_sp58</i></li> <li><i>Crabro_sp59</i></li> <li><i>Crabro_sp60</i></li> <li><i>Crabro_sp61</i></li> <li><i>Crabro_sp62</i></li> <li><i>Crabro_sp63</i></li> <li><i>Crabro_sp64</i></li> <li><i>Crabro_sp65</i></li> <li><i>Crabro_sp66</i></li> <li><i>Crabro_sp67</i></li> <li><i>Crabro_sp68</i></li> <li><i>Crabro_sp69</i></li> <li><i>Crabro_sp70</i></li> <li><i>Crabro_sp71</i></li> <li><i>Crabro_sp72</i></li> <li><i>Crabro_sp73</i></li> <li><i>Crabro_sp74</i></li> <li><i>Crabro_sp75</i></li> <li><i>Crabro_sp76</i></li> <li><i>Crabro_sp77</i></li> <li><i>Crabro_sp78</i></li> <li><i>Crabro_sp79</i></li> <li><i>Crabro_sp80</i></li> <li><i>Crabro_sp81</i></li> <li><i>Crabro_sp82</i></li> <li><i>Crabro_sp83</i></li> <li><i>Crabro_sp84</i></li> <li><i>Crabro_sp85</i></li> <li><i>Crabro_sp86</i></li> <li><i>Crabro_sp87</i></li> <li><i>Crabro_sp88</i></li> <li><i>Crabro_sp89</i></li> <li><i>Crabro_sp90</i></li> <li><i>Crabro_sp91</i></li> <li><i>Crabro_sp92</i></li> <li><i>Crabro_sp93</i></li> <li><i>Crabro_sp94</i></li> <li><i>Crabro_sp95</i></li> <li><i>Crabro_sp96</i></li> <li><i>Crabro_sp97</i></li> <li><i>Crabro_sp98</i></li> <li><i>Crabro_sp99</i></li> <li><i>Crabro_sp100</i></li> </ul>                                                                                                                                                                                                                                                                                                                                                                                                                                                                                                                                                                                                                                                                                                                                                                                                                                                                                                                                                                                                                                                                                                                                           |
| 3                                 | Panini + Oobrotaphini                                                                                                                                                                                                                                                                                                                                                                                                                                                                                                                                                                                                                                                                                                                                                                                                                                                                                                                                                                                                                                                                                                                                                                                                                                                                                                                                                                                                                                                                                                                                                                                                                                                                                                                                                                                                                                                                                                                                                                                                                                                                                                                                                                                                                                                                                                                                                                                                                                                                                                                                                                                                                                                                                                                                                                                                                                                                                                                                                                                                                                                                                                                                                                                                                                                                                                                                                                                                                                                                                                                                                                                                                                                        |                                  |                                                                                                                                                                                                                                                                                                                                                                                                                                                                                                                                                                                                                                                                                                                                                                                                                                                                                                                                                                                                                                                                                                                                                                                                                                                                                                                                                                                                                                                                                                                                                                                                                                                                                                                                                                                                                                                                                                                                                                                                                                                                                                                                                                                                                                                                                                                                                                                                                                                                                                                                                                                                                                                                                                                                                                                                                                                                                                                                                                                                                                                                                                                                                                                                                                                                                                                                                                                                                                                                                                                                                                                                                                                                                                                                                                                                                                                                                                                                                                                                                                                                                                                                                  |
|                                   | <ul style="list-style-type: none"> <li><i>Mellicta_venusta</i></li> <li><i>Oobrotaphus_pseudus</i></li> <li><i>Paninus_ductus</i></li> <li><i>Paninus_hirticornis</i></li> <li><i>Paninus_sp1</i></li> </ul>                                                                                                                                                                                                                                                                                                                                                                                                                                                                                                                                                                                                                                                                                                                                                                                                                                                                                                                                                                                                                                                                                                                                                                                                                                                                                                                                                                                                                                                                                                                                                                                                                                                                                                                                                                                                                                                                                                                                                                                                                                                                                                                                                                                                                                                                                                                                                                                                                                                                                                                                                                                                                                                                                                                                                                                                                                                                                                                                                                                                                                                                                                                                                                                                                                                                                                                                                                                                                                                                 |                                  |                                                                                                                                                                                                                                                                                                                                                                                                                                                                                                                                                                                                                                                                                                                                                                                                                                                                                                                                                                                                                                                                                                                                                                                                                                                                                                                                                                                                                                                                                                                                                                                                                                                                                                                                                                                                                                                                                                                                                                                                                                                                                                                                                                                                                                                                                                                                                                                                                                                                                                                                                                                                                                                                                                                                                                                                                                                                                                                                                                                                                                                                                                                                                                                                                                                                                                                                                                                                                                                                                                                                                                                                                                                                                                                                                                                                                                                                                                                                                                                                                                                                                                                                                  |
| 4                                 | Remaining spid wasp and outgroups                                                                                                                                                                                                                                                                                                                                                                                                                                                                                                                                                                                                                                                                                                                                                                                                                                                                                                                                                                                                                                                                                                                                                                                                                                                                                                                                                                                                                                                                                                                                                                                                                                                                                                                                                                                                                                                                                                                                                                                                                                                                                                                                                                                                                                                                                                                                                                                                                                                                                                                                                                                                                                                                                                                                                                                                                                                                                                                                                                                                                                                                                                                                                                                                                                                                                                                                                                                                                                                                                                                                                                                                                                            | 4                                | Remaining spid wasps bees and outgroups                                                                                                                                                                                                                                                                                                                                                                                                                                                                                                                                                                                                                                                                                                                                                                                                                                                                                                                                                                                                                                                                                                                                                                                                                                                                                                                                                                                                                                                                                                                                                                                                                                                                                                                                                                                                                                                                                                                                                                                                                                                                                                                                                                                                                                                                                                                                                                                                                                                                                                                                                                                                                                                                                                                                                                                                                                                                                                                                                                                                                                                                                                                                                                                                                                                                                                                                                                                                                                                                                                                                                                                                                                                                                                                                                                                                                                                                                                                                                                                                                                                                                                          |
|                                   | <ul style="list-style-type: none"> <li><i>Acantobothrus_sp1</i></li> <li><i>Acantobothrus_sp2</i></li> <li><i>Acantobothrus_sp3</i></li> <li><i>Acantobothrus_sp4</i></li> <li><i>Acantobothrus_sp5</i></li> <li><i>Acantobothrus_sp6</i></li> <li><i>Acantobothrus_sp7</i></li> <li><i>Acantobothrus_sp8</i></li> <li><i>Acantobothrus_sp9</i></li> <li><i>Acantobothrus_sp10</i></li> <li><i>Acantobothrus_sp11</i></li> <li><i>Acantobothrus_sp12</i></li> <li><i>Acantobothrus_sp13</i></li> <li><i>Acantobothrus_sp14</i></li> <li><i>Acantobothrus_sp15</i></li> <li><i>Acantobothrus_sp16</i></li> <li><i>Acantobothrus_sp17</i></li> <li><i>Acantobothrus_sp18</i></li> <li><i>Acantobothrus_sp19</i></li> <li><i>Acantobothrus_sp20</i></li> <li><i>Acantobothrus_sp21</i></li> <li><i>Acantobothrus_sp22</i></li> <li><i>Acantobothrus_sp23</i></li> <li><i>Acantobothrus_sp24</i></li> <li><i>Acantobothrus_sp25</i></li> <li><i>Acantobothrus_sp26</i></li> <li><i>Acantobothrus_sp27</i></li> <li><i>Acantobothrus_sp28</i></li> <li><i>Acantobothrus_sp29</i></li> <li><i>Acantobothrus_sp30</i></li> <li><i>Acantobothrus_sp31</i></li> <li><i>Acantobothrus_sp32</i></li> <li><i>Acantobothrus_sp33</i></li> <li><i>Acantobothrus_sp34</i></li> <li><i>Acantobothrus_sp35</i></li> <li><i>Acantobothrus_sp36</i></li> <li><i>Acantobothrus_sp37</i></li> <li><i>Acantobothrus_sp38</i></li> <li><i>Acantobothrus_sp39</i></li> <li><i>Acantobothrus_sp40</i></li> <li><i>Acantobothrus_sp41</i></li> <li><i>Acantobothrus_sp42</i></li> <li><i>Acantobothrus_sp43</i></li> <li><i>Acantobothrus_sp44</i></li> <li><i>Acantobothrus_sp45</i></li> <li><i>Acantobothrus_sp46</i></li> <li><i>Acantobothrus_sp47</i></li> <li><i>Acantobothrus_sp48</i></li> <li><i>Acantobothrus_sp49</i></li> <li><i>Acantobothrus_sp50</i></li> <li><i>Acantobothrus_sp51</i></li> <li><i>Acantobothrus_sp52</i></li> <li><i>Acantobothrus_sp53</i></li> <li><i>Acantobothrus_sp54</i></li> <li><i>Acantobothrus_sp55</i></li> <li><i>Acantobothrus_sp56</i></li> <li><i>Acantobothrus_sp57</i></li> <li><i>Acantobothrus_sp58</i></li> <li><i>Acantobothrus_sp59</i></li> <li><i>Acantobothrus_sp60</i></li> <li><i>Acantobothrus_sp61</i></li> <li><i>Acantobothrus_sp62</i></li> <li><i>Acantobothrus_sp63</i></li> <li><i>Acantobothrus_sp64</i></li> <li><i>Acantobothrus_sp65</i></li> <li><i>Acantobothrus_sp66</i></li> <li><i>Acantobothrus_sp67</i></li> <li><i>Acantobothrus_sp68</i></li> <li><i>Acantobothrus_sp69</i></li> <li><i>Acantobothrus_sp70</i></li> <li><i>Acantobothrus_sp71</i></li> <li><i>Acantobothrus_sp72</i></li> <li><i>Acantobothrus_sp73</i></li> <li><i>Acantobothrus_sp74</i></li> <li><i>Acantobothrus_sp75</i></li> <li><i>Acantobothrus_sp76</i></li> <li><i>Acantobothrus_sp77</i></li> <li><i>Acantobothrus_sp78</i></li> <li><i>Acantobothrus_sp79</i></li> <li><i>Acantobothrus_sp80</i></li> <li><i>Acantobothrus_sp81</i></li> <li><i>Acantobothrus_sp82</i></li> <li><i>Acantobothrus_sp83</i></li> <li><i>Acantobothrus_sp84</i></li> <li><i>Acantobothrus_sp85</i></li> <li><i>Acantobothrus_sp86</i></li> <li><i>Acantobothrus_sp87</i></li> <li><i>Acantobothrus_sp88</i></li> <li><i>Acantobothrus_sp89</i></li> <li><i>Acantobothrus_sp90</i></li> <li><i>Acantobothrus_sp91</i></li> <li><i>Acantobothrus_sp92</i></li> <li><i>Acantobothrus_sp93</i></li> <li><i>Acantobothrus_sp94</i></li> <li><i>Acantobothrus_sp95</i></li> <li><i>Acantobothrus_sp96</i></li> <li><i>Acantobothrus_sp97</i></li> <li><i>Acantobothrus_sp98</i></li> <li><i>Acantobothrus_sp99</i></li> <li><i>Acantobothrus_sp100</i></li> </ul> |                                  |                                                                                                                                                                                                                                                                                                                                                                                                                                                                                                                                                                                                                                                                                                                                                                                                                                                                                                                                                                                                                                                                                                                                                                                                                                                                                                                                                                                                                                                                                                                                                                                                                                                                                                                                                                                                                                                                                                                                                                                                                                                                                                                                                                                                                                                                                                                                                                                                                                                                                                                                                                                                                                                                                                                                                                                                                                                                                                                                                                                                                                                                                                                                                                                                                                                                                                                                                                                                                                                                                                                                                                                                                                                                                                                                                                                                                                                                                                                                                                                                                                                                                                                                                  |
